# Supplementary material for: Molecular genetic analysis using targeted NGS analysis of 677 individuals with retinal dystrophy
Source: PubMed Central journal article supplement (PMC6362094; doi:10.1038/s41598-018-38007-2), 2019-02-04
Supplement: 41598_2018_38007_MOESM1_ESM.pdf [file 41598_2018_38007_MOESM1_ESM.pdf]

# **Molecular genetic analysis using targeted NGS analysis of 677 individuals with retinal dystrophy**

Cathrine Jespersgaard<sup>1,+</sup>, Mingyan Fang<sup>2,3,4+</sup>, Mette Bertelsen<sup>1,5</sup>, Xiao Dang<sup>2,3</sup>, Hanne Jensen<sup>5</sup>, Yulan Chen<sup>2,3</sup>, Niels Bech<sup>5</sup>, Lanlan Dai<sup>2,3</sup>, Thomas Rosenberg<sup>5</sup>, Jianguo Zhang<sup>2,3</sup>, Lisbeth Birk Møller<sup>1</sup>, Zeynep Tümer<sup>1,6</sup>, Karen Brøndum-Nielsen<sup>1</sup> and Karen Grønskov<sup>1,\*</sup>

Table S1

| Diagnosis                                                                 | Number of individuals |
|---------------------------------------------------------------------------|-----------------------|
| <b>1. Generalized retinal dystrophy (non-syndromic)</b>                   | <b>486</b>            |
| Retinitis pigmentosa                                                      |                       |
| Leber congenital amaurosis                                                |                       |
| Cone-rod dystrophy                                                        |                       |
| Choroideremia                                                             |                       |
| Generalized choriocapillaris dystrophy (GCCD)                             |                       |
| Gyrate atrophy                                                            |                       |
| Unspecified generalized retinal and chorioretinal dystrophy               |                       |
|                                                                           |                       |
| <b>2. Isolated cone disease</b>                                           | <b>24</b>             |
| Cone dystrophy                                                            |                       |
| Achromatopsia                                                             |                       |
| Oligocone trichromacy                                                     |                       |
|                                                                           |                       |
| <b>3. Macular dystrophy</b>                                               | <b>118</b>            |
| Best vitelliform macular dystrophy                                        |                       |
| Adult –onset vitelliform macular dystrophy ( including Pattern dystrophy) |                       |
| Stargardt disease ( Stargardt macular dystrophy, fundus flavimaculatus)   |                       |
| North Carolina macular dystrophy                                          |                       |
| Macular dystrophy unspecified                                             |                       |
|                                                                           |                       |
| <b>4. Vitreoretinopathies</b>                                             | <b>5</b>              |
| Erosive vitreoretinopathies                                               |                       |
| Enhanced S cone syndrome (ESCS) (incl Goldmann-Favre syndrome)            |                       |
| Snowflake vitreoretinal degeneration                                      |                       |
| Autosomal dominant vitreoretinopathies (ADVIRC)                           |                       |
| Wagner syndrome and erosive vitreoretinopathy                             |                       |
| Familial exudative vitreoretinopathies (FEVRs)incl Norrie disease         |                       |
| X-linked juvenile retinoschisis                                           |                       |
| Vitreoretinopathy unspecified                                             |                       |
|                                                                           |                       |
| <b>5. Other non-syndromic retinal dystrophies</b>                         | <b>16</b>             |
| Congenital stationary night blindness                                     |                       |
| Bietti crystalline retinopathy                                            |                       |
| Oculocutaneous albinism                                                   |                       |
| Åland eye disease                                                         |                       |
| Sorsby pseudoinflammatory fundus dystrophy                                |                       |
| Fundus albipunctatus                                                      |                       |
|                                                                           |                       |
| <b>6. Syndromic retinal dystrophy</b>                                     | <b>27</b>             |
| Usher syndrome .                                                          |                       |
| Bardet Biedl syndrome                                                     |                       |
| Senior Løken Syndrome/Nephronophthisis (SLSN)                             |                       |
| Refsum disease                                                            |                       |

|                                               |          |
|-----------------------------------------------|----------|
| Joubert syndrome                              |          |
| Alagille syndrome (ALGS)                      |          |
| Alstrom syndrome (ALMS)                       |          |
| Neuronal ceroid lipofuscinosis (NCLs or CLNs) |          |
| Primary ciliary dyskinesia (PCD)              |          |
| Unspezifized syndrome                         |          |
|                                               |          |
| <b>7. Retinal vascular dystrophies</b>        | <b>1</b> |
|                                               |          |
|                                               |          |

Table S2

| Gene          | OMIM gene | Inheritance | Phenotype                                  | Number of mutations in HGMD (2018-2) | Function                                                   | NM-number      | Gene ID     |
|---------------|-----------|-------------|--------------------------------------------|--------------------------------------|------------------------------------------------------------|----------------|-------------|
| <i>ABCA4</i>  | 601691    | AR          | Stargardt disease; retinitis pigmentosa 19 | 1030                                 | Visual cycle                                               | NM_000350.2    | NG_009073.1 |
| <i>ADAM9</i>  | 602713    | AR          | Cone-rod dystrophy                         | 8                                    | Cell adhesion/structure                                    | NM_003816.2    | NG_016335.1 |
| <i>ADGRA3</i> | 612303    | AR          | Retinal dystrophy                          | 4                                    | Signal transduction (G-coupled 7 TM receptor)              | NM_145290.3    | NG_032963.1 |
| <i>ADGRV1</i> | 602851    | AR          | Usher syndrome 2C                          | 184                                  | Signal transduction (G-coupled 7 TM receptor)              | NM_032119.3    | NG_007083.2 |
| <i>AIP1</i>   | 604392    | AR          | Leber congenital amaurosis 4               | 70                                   | Nuclear transport, protein trafficking, chaperone activity | NM_014336.4    | NG_008474.1 |
| <i>ALMS1</i>  | 606844    | AR          | Alstrom syndrome                           | 291                                  | Cilia function                                             | NM_015120.4    | NG_011690.1 |
| <i>ARL2BP</i> | 615407    | AR          | Retinitis pigmentosa +/- situs inversus    | 4                                    | Transcription (cofactor)                                   | NM_012106.3    | NG_033905.1 |
| <i>ARL6</i>   | 608845    | AR          | Bardet-Biedl syndrome 3                    | 21                                   | Cilia function                                             | NM_177976.2    | NG_008119.2 |
| <i>BBIP1</i>  | 613605    | AR          | Bardet-Biedl syndrome 18                   | 1                                    | Cilia function                                             | NM_001195306.1 | NG_041778.1 |
| <i>BBS1</i>   | 209901    | AR          | Bardet-Biedl syndrome 1                    | 94                                   | Cilia function                                             | NM_024649.4    | NG_009093.1 |
| <i>BBS10</i>  | 610148    | AR          | Bardet-Biedl syndrome 10                   | 92                                   | Cilia function                                             | NM_024685.3    | NG_016357.1 |
| <i>BBS12</i>  | 610683    | AR          | Bardet-Biedl syndrome 12                   | 50                                   | Cilia function                                             | NM_152618.2    | NG_021203.1 |
| <i>BBS2</i>   | 606151    | AR          | Bardet-Biedl syndrome 2                    | 81                                   | Cilia function                                             | NM_031885.3    | NG_009312.1 |
| <i>BBS4</i>   | 600374    | AR          | Bardet-Biedl syndrome 4                    | 47                                   | Cilia function                                             | NM_033028.4    | NG_009416.2 |
| <i>BBS5</i>   | 603650    | AR          | Bardet-Biedl syndrome 5                    | 25                                   | Cilia function                                             | NM_152384.2    | NG_011567.1 |

|                   |        |    |                                                                            |     |                                          |                |             |
|-------------------|--------|----|----------------------------------------------------------------------------|-----|------------------------------------------|----------------|-------------|
| <i>BBS7</i>       | 607590 | AR | Bardet-Biedl syndrome 7                                                    | 38  | Cilia function                           | NM_176824.2    | NG_009111.1 |
| <i>BBS9</i>       | 607968 | AR | Bardet-Biedl syndrome 9                                                    | 41  | Cilia function                           | NM_198428.2    | NG_009306.2 |
| <i>BEST1 (AD)</i> | 607854 | AD | Macular dystrophy, vitelliform 2                                           | 292 | Ion channel (Ca2+)                       | NM_004183.3    | NG_009033.1 |
| <i>BEST1 (AR)</i> | 607854 | AR | Bestrophinopathy                                                           |     | Ion channel (Ca2+)                       | NM_004183.3    | NG_009033.1 |
| <i>C1QTNF5</i>    | 608752 | AD | Retinal degeneration late onset                                            | 6   | Cell adhesion/structure                  | NM_015645.4    | NG_012235.1 |
| <i>C21ORF2</i>    | 603191 | AR | Early onset retinal dystrophy                                              | 17  | Cilia function                           | NM_004928.2    | NG_032952.1 |
| <i>PCARE</i>      | 613425 | AR | Retinitis pigmentosa 54                                                    | 40  | Cilia function                           | NM_001029883.2 | NG_021427.1 |
| <i>C8ORF37</i>    | 614477 | AR | Bardet-Biedl syndrome 21; Cone-rod dystrophy 16; Retinitis pigmentosa 64   | 12  | Cilia function                           | NM_177965.3    | NG_032804.1 |
| <i>CA4</i>        | 114760 | AD | Retinitis pigmentosa 17                                                    | 8   | Acid overload removal                    | NM_000717.3    | NG_012050.2 |
| <i>CABP4</i>      | 608965 | AR | Cone-rod synaptic disorder, congenital non progressive                     | 11  | Synaptic function. Ca2+ influx regulator | NM_145200.3    | NG_021211.1 |
| <i>CACNA1F</i>    | 300110 | XL | Åland eye disease; Night blindness congenital stationary                   | 170 | Ion channel (Ca2+)                       | NM_005183.3    | NG_009095.2 |
| <i>CACNA2D4</i>   | 608171 | AR | Retinal cone dystrophy                                                     | 4   | Ion channel (Ca2+)                       | NM_172364.4    | NG_012663.1 |
| <i>CDH23</i>      | 605516 | AR | Usher type 1D; deafness                                                    | 288 | Cell adhesion/structure                  | NM_022124.5    | NG_008835.1 |
| <i>CDH3</i>       | 114021 | AR | Hypotrichosis congenital with juvenile macular dystrophy; Ectodermal       | 29  | Cell adhesion/structure                  | NM_001793.4    | NG_009096.1 |
| <i>CDHR1</i>      | 609502 | AR | Retinitis pigmentosa 65; Cone-rod dystrophy 15                             | 34  | Cell adhesion/structure                  | NM_033100.3    | NG_028034.1 |
| <i>CEP290</i>     | 610142 | AR | Leber congenital amaurosis 10; Meckel syndrome 4; Senior Loken syndrome 6; | 262 | Cilia function                           | NM_025114.3    | NG_008417.1 |

|                |        |    |                                                       |     |                         |                |             |
|----------------|--------|----|-------------------------------------------------------|-----|-------------------------|----------------|-------------|
| <i>CERKL</i>   | 608381 | AR | Retinitis pigmentosa 26                               | 34  | No information          | NM_001030311.2 | NG_021178.1 |
| <i>CHM</i>     | 300390 | XL | Choroideremia                                         | 273 | Signal transduction     | NM_000390.2    | NG_009874.2 |
| <i>CLRN1</i>   | 606397 | AR | Usher syndrome type 3A; Retinitis pigmentosa 61       | 37  | No information          | NM_174878.2    | NG_009168.1 |
| <i>CNGA1</i>   | 123825 | AR | Retinitis pigmentosa 49                               | 27  | Phototransduction       | NM_000087.3    | NG_009193.1 |
| <i>CNGB1</i>   | 600724 | AR | Retinitis pigmentosa 45                               | 34  | Phototransduction       | NM_001297.4    | NG_016351.1 |
| <i>CNGB3</i>   | 605080 | AR | Achromatopsia 3                                       | 114 | Phototransduction       | NM_019098.4    | NG_016980.1 |
| <i>CNNM4</i>   | 607805 | AR | Jalili syndrome                                       | 23  | No information          | NM_020184.3    | NG_016608.1 |
| <i>CRB1</i>    | 604210 | AR | Leber congenital amaurosis 8; Retinitis pigmentosa 12 | 299 | Cell adhesion/structure | NM_201253.2    | NG_008483.2 |
| <i>CRX</i>     | 602225 | AD | Cone-rod dystrophia; Leber congenital amaurosis 7     | 92  | Transcription factor    | NM_000554.4    | NG_008605.1 |
| <i>DHDDS</i>   | 608172 | AR | Retinitis pigmentosa 59                               | 8   | No information          | NM_024887.3    | NG_029786.1 |
| <i>ELOVL4</i>  | 605512 | AD | Stargardt disease 3                                   | 11  | Cell adhesion/structure | NM_022726.3    | NG_009108.1 |
| <i>EYS</i>     | 612424 | AR | Retinitis pigmentosa 25                               | 252 | Cell adhesion/structure | NM_001142800.1 | NG_023443.2 |
| <i>FAM161A</i> | 613596 | AR | Retinitis pigmentosa 28                               | 17  | Cilia function          | NM_001201543.1 | NG_028125.1 |
| <i>FLVCR1</i>  | 609144 | AR | Ataxia, posterior column, with retinitis pigmentosa   | 14  | Transport (heme)        | NM_014053.3    | NG_028131.1 |
| <i>FSCN2</i>   | 607643 | AD | Reported retinitis pigmentosa 30                      | 1   | No information          | NM_001077182.2 | NG_015964.1 |
| <i>GNAT1</i>   | 139330 | AD | Night blindness congenital stationary 3               | 7   | Phototransduction       | NM_144499.2    | NG_009831.1 |

|                    |        |    |                                                        |     |                                               |                |             |
|--------------------|--------|----|--------------------------------------------------------|-----|-----------------------------------------------|----------------|-------------|
| <i>GPR179</i>      | 614615 | AR | Night blindness congenital stationary                  | 14  | Signal transduction (G-coupled 7 TM receptor) | NM_001004334.3 | NG_032655.2 |
| <i>GRK1</i>        | 180381 | AR | Oguchi disease 2                                       | 16  | Phototransduction                             | NM_002929.2    |             |
| <i>GRM6</i>        | 604096 | AR | Night blindness congenital stationary 1B               | 35  | Signal transduction (glutamate receptor)      | NM_000843.3    | NG_008105.1 |
| <i>GUCA1A</i>      | 600364 | AD | Cone dystrophy 3; Cone-rod dystrophy 14                | 20  | Phototransduction                             | NM_000409.3    | NG_009938.1 |
| <i>GUCA1B</i>      | 602275 | AD | Retinitis pigmentosa 48                                | 4   | Phototransduction                             | NM_002098.5    | NG_016216.1 |
| <i>GUCY2D (AD)</i> | 600179 | AD | Cone-rod dystrophy 6 (AD)                              | 219 | Phototransduction                             | NM_000180.3    | NG_009092.1 |
| <i>GUCY2D (AR)</i> | 600179 | AR | Leber congenital amaurosis 1 (AR);                     |     | Phototransduction                             | NM_000180.3    | NG_009092.1 |
| <i>IDH3B</i>       | 604526 | AR | Retinitis pigmentosa 46                                | 0   | Citric acid cycle                             | NM_006899.3    | NG_012149.1 |
| <i>IMPDH1</i>      | 146690 | AD | Retinitis pigmentosa 10; Leber congenital amaurosis 11 | 15  | Cell growth                                   | NM_000883.3    | NG_009194.1 |
| <i>IMPG2</i>       | 607056 | AR | Retinitis pigmentosa 56; Macular dystrophy             | 34  | Cell adhesion/structure                       | NM_016247.3    | NG_028284.1 |
| <i>INPP5E</i>      | 613037 | AR | Joubert syndrome 1                                     | 46  | Signal transduction                           | NM_019892.4    | NG_016126.1 |
| <i>IQCB1</i>       | 609237 | AR | Senior Loken syndrome                                  | 39  | Cilia function                                | NM_001023570.2 | NG_015887.1 |
| <i>KCNV2</i>       | 607604 | AR | Retinal cone dystrophy                                 | 87  | Ion channel (K+)                              | NM_133497.3    | NG_012181.1 |
| <i>KLHL7</i>       | 611119 | AD | Retinitis pigmentosa 42                                | 11  | No information                                | NM_001031710.2 | NG_016983.1 |
| <i>LCA5</i>        | 611408 | AR | Leber congenital amaurosis 5                           | 47  | Cilia function                                | NM_181714.3    | NG_016011.1 |
| <i>LRAT</i>        | 604863 | AR | Leber congenital amaurosis 14                          | 16  | Visual cycle                                  | NM_004744.4    | NG_009110.1 |

|                   |        |    |                                                            |     |                         |                |             |
|-------------------|--------|----|------------------------------------------------------------|-----|-------------------------|----------------|-------------|
| <i>LRIT3</i>      | 615004 | AR | Night blindness congenital stationary                      | 5   | Cell adhesion/structure | NM_198506.4    | NG_033249.1 |
| <i>LZTFL1</i>     | 606568 | AR | Bardet-Biedl syndrome 17                                   | 3   | Cilia function          | NM_020347.3    | NG_033917.1 |
| <i>MAK</i>        | 154235 | AR | Retinitis pigmentosa 62                                    | 16  | Cilia function          | NM_001242957.1 | NG_030040.1 |
| <i>MERTK</i>      | 604705 | AR | Retinitis pigmentosa 38                                    | 58  | Phagocytosis            | NM_006343.2    | NG_011607.1 |
| <i>MKKS</i>       | 604896 | AR | Bardet-Biedl syndrome 6; McKusick Kaufmann syndrome        | 55  | Cilia function          | NM_018848.3    | NG_009109.1 |
| <i>MKS1</i>       | 609883 | AR | Bardet-Biedl syndrome13; Joubert syndrome; Meckel syndrome | 46  | Cilia function          | NM_017777.3    | NG_013032.1 |
| <i>MVK</i>        | 251170 | AR | Retinitis pigmentosa                                       | 169 | Signal transduction     | NM_000431.3    | NG_007702.1 |
| <i>MYO7A</i>      | 276903 | AR | Usher syndrome 1B; isolated deafness                       | 468 | Cilia function          | NM_000260.3    | NG_009086.1 |
| <i>NR2E3 (AD)</i> | 604485 | AD | Retinitis pigmentosa 37 (AD)                               | 69  | Transcription factor    | NM_014249.3    | NG_009113.2 |
| <i>NR2E3 (AR)</i> | 604485 | AR | Enhanced S-cone syndrome (AR)                              |     | Transcription factor    | NM_014249.3    | NG_009113.2 |
| <i>NRL</i>        | 162080 | AD | Retinitis pigmentosa 27                                    | 23  | Transcription factor    | NM_006177.3    | NG_011697.1 |
| <i>NYX</i>        | 300278 | XL | Night blindness congenital stationary                      | 87  | No information          | NM_022567.2    | NG_009112.1 |
| <i>OFD1</i>       | 300170 | XL | Joubert syndrome 10                                        | 152 | Cilia function          | NM_003611.2    | NG_008872.1 |
| <i>PCDH15</i>     | 605514 | AR | Usher syndrome 1F; isolated deafness                       | 101 | Cell adhesion/structure | NM_033056.3    | NG_009191.2 |
| <i>PDE6A</i>      | 180071 | AR | Retinitis pigmentosa 43                                    | 38  | Phototransduction       | NM_000440.2    | NG_009102.1 |
| <i>PDE6B (AD)</i> | 180072 | AD | NBSC (AD)                                                  | 103 | Phototransduction       | NM_000283.3    | NG_009839.1 |



|                    |        |                    |                                                                        |     |                                                        |                |             |
|--------------------|--------|--------------------|------------------------------------------------------------------------|-----|--------------------------------------------------------|----------------|-------------|
| <i>PDE6B (AR)</i>  | 180072 | AR                 | Retinitis pigmentosa 40 (AR)                                           |     | Phototransduction                                      | NM_000283.3    | NG_009839.1 |
| <i>PDE6C</i>       | 600827 | AR                 | Cone dystrophy 4                                                       | 36  | Phototransduction                                      | NM_006204.3    | NG_016752.1 |
| <i>PDE6G</i>       | 180073 | AR                 | Retinitis pigmentosa 57                                                | 2   | Phototransduction                                      | NM_002602.3    | NG_009834.1 |
| <i>PDZD7</i>       | 612971 | ?                  | Usher syndrome 2C                                                      | 18  | Cilia function                                         | NM_001195263.1 | NG_028030.1 |
| <i>PITPNM3</i>     | 608921 | AD                 | Cone-rod dystrophy 5                                                   | 3   | Signal transduction<br>(phosphatidylinositol transfer) | NM_031220.3    | NG_016020.1 |
| <i>PRCD</i>        | 610598 | AR                 | Retinitis pigmentosa 36                                                | 6   | No information                                         | NM_001077620.2 | NG_016702.1 |
| <i>PROM1</i>       | 604365 | AR                 | Cone-rod dystrophy 12; Macular dystrophy 2; Retinitis pigmentosa 41 (1 | 58  | Cellular structure                                     | NM_006017.2    | NG_011696.1 |
| <i>PRPF3</i>       | 607301 | AD                 | Retinitis pigmentosa 18                                                | 6   | Splicing factor                                        | NM_004698.2    | NG_008245.1 |
| <i>PRPF31</i>      | 606419 | AD                 | Retinitis pigmentosa 11                                                | 142 | Splicing factor                                        | NM_015629.3    | NG_009759.1 |
| <i>PRPF6</i>       | 613979 | AD                 | Retinitis pigmentosa 60                                                | 4   | Splicing factor                                        | NM_012469.3    | NG_029719.1 |
| <i>PRPF8</i>       | 607300 | AD                 | Retinitis pigmentosa 13                                                | 37  | Splicing factor                                        | NM_006445.3    | NG_009118.1 |
| <i>PRPH2 (RDS)</i> | 179605 | AD + DIGEN (+ROM1) | Retinitis pigmentosa 7; Leber congenital amaurosis 18; Macualr         | 161 | Cell adhesion/structure                                | NM_000322.4    | NG_009176.1 |
| <i>RAB28</i>       | 612994 | AR                 | Cone-rod dystrophy 18                                                  | 4   | Intracellular trafficking                              | NM_004249.3    | NG_033891.1 |
| <i>RAX2</i>        | 610362 | AD                 | Cone-rod dystrophy 11                                                  | 4   | Transcription                                          | NM_032753.3    | NG_011565.1 |
| <i>RBP3</i>        | 180290 | AR                 | ?Retinitis pigmentosa 66                                               | 8   | Visual cycle                                           | NM_002900.2    | NG_029718.1 |
| <i>RBP4</i>        | 180250 | AR                 | Retinal dystrophy plus colobom; microphthalmia plus colobom            | 7   | Visual cycle                                           | NM_006744.3    | NG_009104.1 |

|                 |        |               |                                                       |     |                                               |                |             |
|-----------------|--------|---------------|-------------------------------------------------------|-----|-----------------------------------------------|----------------|-------------|
| <i>RDH12</i>    | 608830 | AR            | Leber congenital amaurosis 13                         | 92  | Visual cycle                                  | NM_152443.2    | NG_008321.1 |
| <i>RDH5</i>     | 601617 | AR            | Fundus albipunctatus                                  | 48  | Visual cycle                                  | NM_002905.3    | NG_008606.1 |
| <i>RGR</i>      | 600342 | AR            | Retinitis pigmentosa 44                               | 8   | Signal transduction (G-coupled 7 TM receptor) | NM_001012720.1 | NG_009106.1 |
| <i>RGS9</i>     | 604067 | AR            | Bradyopsia                                            | 2   | Phototransduction                             | NM_003835.3    | NG_013021.1 |
| <i>RGS9BP</i>   | 607814 | AR            | Bradyopsia                                            | 6   | Phototransduction                             | NM_207391.2    | NG_016751.1 |
| <i>RHO</i>      | 180380 | AD            | Retinitis pigmentosa 4                                | 198 | Phototransduction                             | NM_000539.3    | NG_009115.1 |
| <i>RIMS1</i>    | 606629 | AD            | Cone-rod dystrophy 7                                  | 4   | Exocytosis                                    | NM_014989.5    | NG_016209.1 |
| <i>RLBP1</i>    | 180090 | AR            | Rod-cone dystrophy; retinitis puctata albescens       | 31  | Visual cycle                                  | NM_000326.4    | NG_008116.1 |
| <i>ROM1</i>     | 180721 | DIGEN (+PRPH) | Retinitis pigmentosa 7                                | 11  | Disc morphogenesis                            | NM_000327.3    | NG_009845.1 |
| <i>RP1 (AD)</i> | 603937 | AD            | Retinitis pigmentosa 1                                | 153 | Cilia function                                | NM_006269.1    | NG_009840.1 |
| <i>RP1 (AR)</i> | 603937 | AR            | Retinitis pigmentosa 1                                |     | Cilia function                                | NM_006269.1    | NG_009840.1 |
| <i>RP1L1</i>    | 608581 | AR            | Occult macular dystrophy                              | 27  | Cilia function                                | NM_178857.5    | NG_028035.1 |
| <i>RP2</i>      | 300757 | XL            | Retinitis pigmentosa 2                                | 106 | Signal transduction                           | NM_006915.2    | NG_009107.1 |
| <i>RP9</i>      | 607331 | AD            | ?Retinitis pigmentosa 9                               | 0   | Splicing factor                               | NM_203288.1    | NG_012968.1 |
| <i>RPE65</i>    | 180069 | AR            | Leber congenital amaurosis 2; Retinitis pigmentosa 20 | 178 | Visual cycle                                  | NM_000329.2    | NG_008472.1 |
| <i>RPGR</i>     | 312610 | XL            | Cone-rod dystrophy 3; Retinitis pigmentosa 3          | 192 | Cilia function                                | NM_000328.2    | NG_009553.1 |

|                 |        |    |                                                        |     |                                 |             |              |
|-----------------|--------|----|--------------------------------------------------------|-----|---------------------------------|-------------|--------------|
| <i>RPGRIP1</i>  | 605446 | AR | Leber congenital amaurosis 6; Cone-rod dystrophy 13    | 122 | Cilia function                  | NM_020366.3 | NG_008933.1  |
| <i>SAG</i>      | 181031 | AR | Oguchi disease; Retinitis pigmentosa 47                | 9   | Phototransduction               | NM_000541.4 | NG_009116.1  |
| <i>SDCCAG8</i>  | 613524 | AR | Bardet-Biedl syndrome 16; Senior Loken syndrome        | 17  | Cilia function                  | NM_006642.3 | NG_027811.1  |
| <i>SEMA4A</i>   | 607292 | AR | Cone-rod dystrophy 10; Retinitis pigmentosa 35         | 7   | Cell-cell signalling            | NM_022367.3 | NG_027683.1  |
| <i>SLC24A1</i>  | 603617 | AR | Night blindness congenital stationary                  | 6   | Phototransduction               | NM_004727.2 | NG_031968.2  |
| <i>SNRNP200</i> | 611664 | AD | Retinitis pigmentosa 33                                | 21  | Splicing factor                 | NM_014014.4 | NG_018973.1  |
| <i>SPATA7</i>   | 609868 | AR | Leber congenital amaurosis 3                           | 36  | Cilia function                  | NM_018418.4 | NG_021183.1  |
| <i>TEAD1</i>    | 189967 | AD | Sveinsson chorioretinal atrophy                        | 2   | Transcription factor            | NM_021961.5 | NG_0021302.1 |
| <i>TIMP3</i>    | 188826 | AD | Sorsby fundus dystrophy                                | 17  | Matrix metalloproteinase        | NM_000362.4 | NG_009117.1  |
| <i>TOPORS</i>   | 609507 | AD | Retinitis pigmentosa 31                                | 13  | Cilia function                  | NM_005802.4 | NG_017050.1  |
| <i>TRIM32</i>   | 602290 | AR | ?Bardet-Biedl syndrome 11                              | 15  | E3 ubiquitin ligase             | NM_012210.3 | NG_011619.1  |
| <i>TRPM1</i>    | 603576 | AR | Night blindness congenital stationary                  | 65  | Ion channel (Ca <sup>2+</sup> ) | NM_002420.5 | NG_016453.2  |
| <i>TTC8</i>     | 608132 | AR | Bardet-Biedl syndrome 8                                | 13  | Cilia function                  | NM_198309.3 | NG_008126.1  |
| <i>TULP1</i>    | 302280 | AR | Leber congenital amaurosis 15; Retinitis pigmentosa 14 | 62  | Cilia function                  | NM_003322.4 | NG_009077.1  |
| <i>USH1C</i>    | 605242 | AR | Usher syndrome 1C; isolated deafness                   | 38  | Scaffolding                     | NM_005709.3 | NG_011883.1  |
| <i>USH1G</i>    | 607696 | AR | Usher asynrome 1G                                      | 28  | Scaffolding                     | NM_173477.4 | NG_007882.2  |

|               |        |    |                                            |     |                                 |             |             |
|---------------|--------|----|--------------------------------------------|-----|---------------------------------|-------------|-------------|
| <i>USH2A</i>  | 608400 | AR | Usher syndrome 2A; Retinitis pigmentosa 39 | 974 | Cilia function                  | NM_206933.2 | NG_009497.1 |
| <i>WHRN</i>   | 607928 | AR | Usher type 1D; Deafness 31                 | 21  | Cilia function                  | NM_015404.3 | NG_016700.1 |
| <i>ZNF513</i> | 613598 | AR | ?Retinitis pigmentosa 58                   | 1   | Transcription factor (possible) | NM_144631.5 | NG_028219.1 |

Table S3

| <b>Target Capture Statistics</b>          | <b>The average value for all samples</b> |
|-------------------------------------------|------------------------------------------|
| Target region (bp)                        | 2,168,860                                |
| Reads mapped to genome                    | 15,845,300                               |
| Bases mapped to target regions (Mb)       | 1156.22                                  |
| Reads mapped to target region             | 12,841,500                               |
| Reads mapped to flanking region           | 1,557,260                                |
| Mean depth of target region (X)           | 533.1                                    |
| Mean depth of flanking regions(X)         | 122.24                                   |
| Coverage of target region (%)             | 98.74                                    |
| Fraction of target covered $\geq 4X$ (%)  | 98.27                                    |
| Fraction of target covered $\geq 10X$ (%) | 97.83                                    |
| Fraction of target covered $\geq 20X$ (%) | 97.29                                    |

Table S5

| No. | Type        | Gene   | Inheritance | Exons            | Deletion/duplication                                                         | Second Variant                |
|-----|-------------|--------|-------------|------------------|------------------------------------------------------------------------------|-------------------------------|
| 25  | deletion    | ABCA4  | AR          | ex 50            | c.(6816+1_6817-1)(*1?)del#                                                   | c.1719G>A p.(Met573Ile)       |
| 39  | deletion    | AIPL1  | AR          | ex 1-2           | c.(?-1)(276+1_277-1)del#                                                     | c.815G>C p.(Arg272Pro)        |
| 93  | deletion    | CNGB3  | AR          | ex 3             | c.(211+1_212-1)(338+1_339-1)del#<br>c.(211+1_212-1)(338+1_339-1)del#         |                               |
| 399 | duplication | CRX    | AD          | entire gene      | c.(?-1)(*1?)dup#                                                             |                               |
| 121 | deletion    | EYS    | AR          | ex 13-22; 15-18; | c.(2023+1_2024-1)(3443+1_3444-1)del#<br>c.(2023+1_2024-1)(3443+1_3444-1)del# |                               |
| 129 | deletion    | EYS    | AR          | ex 17-18         | c.(2641+1_2642-1)(2846+1_2847-1)del#                                         | c.6714del p.(Ile2239Serfs*17) |
| 403 | deletion    | EYS    | AR          | ex 30            | c.(6078+1_6079-1)(6191+1_6192-1)del                                          |                               |
| 126 | duplication | EYS    | AR          | ex 14            | c.(2137+1_2138-1)(2259+1_2260-1)dup#                                         | c.6714del p.(Ile2239Serfs*17) |
| 122 | duplication | EYS    | AR          | ex 30            | c.(6078+1_6079-1)(6191+1_6192-1)dup#<br>c.(6078+1_6079-1)(6191+1_6192-1)dup# |                               |
| 139 | deletion    | GRM6   | AR          | ex 7-9           | c.(1354+1_1355-1)(2436+1_2437-1)del#                                         | c.1861C>T p.(Arg621*)         |
| 152 | deletion    | MERTK  | AR          | ex 1-7           | c.(?-1)(1144+1_1145-1)del<br>c.(?-1)(1144+1_1145-1)del                       |                               |
| 155 | deletion    | MERTK  | AR          | ex 1-7           | c.(?-1)(1144+1_1145-1)del                                                    | c.757+1G>A p.(?)#             |
| 424 | duplication | MERTK  | AR          | ex 2             | c.(61+1_62-1)(482+1_483-1)dup#                                               |                               |
| 189 | deletion    | PRPF31 | AD          | ex 2-14          | c.(?-1)(*1?)del#                                                             |                               |
| 183 | deletion    | PRPF31 | AD          | ex 2-14          | c.(?-1)(*1?)del#                                                             |                               |
| 194 | deletion    | PRPF31 | AD          | ex 2-3           | c.(?-1)(238+1_239-1)del                                                      |                               |
| 187 | duplication | PRPF31 | AD          | ex 4-5           | c.(238+1_239-1)(420+1_421-1)dup#                                             |                               |
| 466 | deletion    | SAG    | AR          | ex 8-10          | c.(512+1_513-1)(806+1_807-1)del#                                             |                               |
| 271 | deletion    | USH2A  | AR          | ex 22-24         | c.(4627+1_4628-1)(4987+1_4988-1)del                                          | c.12161G>T p.(Ser4054Ile)     |
| 297 | duplication | USH2A  | AR          | ex 12-13-14      | c.(1971+1_1972-1)(2993+1_2994-1)dup#                                         | c.10561T>C p.(Trp3521Arg)     |

Table S6

## EYS

| HGVS c. (Clinically Relevant)      | HGVS p. (Clinically Relevant) | Chr:Pos                    | Ref/Alt | Identifier                  | Haplotype |
|------------------------------------|-------------------------------|----------------------------|---------|-----------------------------|-----------|
| NM_001142800:c.8779T>C             | p.Cys2927Arg                  | <a href="#">6:64431148</a> | A/G     | <a href="#">rs373203896</a> | REF       |
| NM_001142800:c.8071+84T>G          |                               | <a href="#">6:64472270</a> | A/C     | <a href="#">rs4710257</a>   | ALT       |
| NM_001142800:c.7723+64T>A          |                               | <a href="#">6:64497934</a> | A/T     | <a href="#">rs72886371</a>  | REF       |
| NM_001142800:c.7666A>T             | p.Ser2556Cys                  | <a href="#">6:64498055</a> | T/A     | <a href="#">rs66462731</a>  | REF       |
| NM_001142800:c.7228+1G>A           |                               | <a href="#">6:64574078</a> | C/T     |                             | REF       |
| NM_001142800:c.7228G>T             | p.Ala2410Ser                  | <a href="#">6:64574079</a> | C/A     |                             | REF       |
| NM_001142800:c.6977G>A             | p.Arg2326Gln                  | <a href="#">6:64694354</a> | C/T     | <a href="#">rs4710457</a>   | REF       |
| NM_001142800:c.6835-64C>T          |                               | <a href="#">6:64694560</a> | G/A     | <a href="#">rs1482457</a>   | REF       |
| NM_001142800:c.6835-124A>G         |                               | <a href="#">6:64694620</a> | T/C     | <a href="#">rs1482456</a>   | REF       |
| NM_001142800:c.6834+61T>G          |                               | <a href="#">6:64708907</a> | A/C     | <a href="#">rs66502009</a>  | REF       |
| NM_001142800:c.6725+130C>T         |                               | <a href="#">6:64776101</a> | G/A     | <a href="#">rs151263607</a> | REF       |
| NM_001142800:c.6714delT            | p.Ile2239Serfs                | <a href="#">6:64776242</a> | A/-     |                             | REF       |
| NM_001142800:c.6191+132G>A         |                               | <a href="#">6:65016731</a> | C/T     | <a href="#">rs9362694</a>   | ALT       |
| NM_001142800:c.5928-35T>C          |                               | <a href="#">6:65098768</a> | A/G     | <a href="#">rs587278</a>    | ALT       |
| NM_001142800:c.5244A>C             | p.Leu1748Phe                  | <a href="#">6:65300516</a> | T/G     | <a href="#">rs57312007</a>  | REF       |
| NM_001142800:c.4256T>C             | p.Leu1419Ser                  | <a href="#">6:65301504</a> | A/G     | <a href="#">rs624851</a>    | REF       |
| NM_001142800:c.3877+94delT         |                               | <a href="#">6:65302916</a> | A/-     | <a href="#">rs11331907</a>  | REF       |
| NM_001142800:c.3444-5C>T           |                               | <a href="#">6:65336143</a> | G/A     | <a href="#">rs9445051</a>   | REF       |
| NM_001142800:c.3443+160T>G         |                               | <a href="#">6:65523111</a> | A/C     | <a href="#">rs9345532</a>   | REF       |
| NM_001142800:c.3243+219G>C         |                               | <a href="#">6:65531319</a> | C/G     | <a href="#">rs1552968</a>   | REF       |
| NM_001142800:c.2847-24C>T          |                               | <a href="#">6:65596759</a> | G/A     | <a href="#">rs7743515</a>   | ALT       |
| NM_001142800:c.2847-157A>G         |                               | <a href="#">6:65596892</a> | T/C     | <a href="#">rs58449017</a>  | REF       |
| NM_001142800:c.2847-221C>T         |                               | <a href="#">6:65596956</a> | G/A     | <a href="#">rs59191409</a>  | REF       |
| NM_001142800:c.2641+198A>C         |                               | <a href="#">6:65622179</a> | T/G     | <a href="#">rs10046141</a>  | ALT       |
| NM_001142800:c.2555T>C             | p.Leu852Pro                   | <a href="#">6:65622463</a> | A/G     | <a href="#">rs9294631</a>   | ALT       |
| NM_001142800:c.2382-26C>G          |                               | <a href="#">6:65622662</a> | G/C     | <a href="#">rs9445437</a>   | ALT       |
| NM_001142800:c.2259+164delT        |                               | <a href="#">6:65707311</a> | A/-     | <a href="#">rs376045129</a> | REF       |
| NM_001142800:c.2138-197dupT        |                               | <a href="#">6:65707793</a> | -/A     | <a href="#">rs200128743</a> | REF       |
| NM_001142800:c.2137+114C>T         |                               | <a href="#">6:65767393</a> | G/A     | <a href="#">rs10455568</a>  | ALT       |
| NM_001142800:c.2024-14_2024-13insT |                               | <a href="#">6:65767634</a> | -/A     | <a href="#">rs142590049</a> | REF       |
| NM_001142800:c.2024-14C>T          |                               | <a href="#">6:65767634</a> | G/A     | <a href="#">rs45628235</a>  | REF       |
| NM_001142800:c.2023+146delA        |                               | <a href="#">6:66005610</a> | T/-     | <a href="#">rs34666704</a>  | ALT       |
| NM_001142800:c.2023+15dupT         |                               | <a href="#">6:66005741</a> | -/A     | <a href="#">rs374955689</a> | REF       |
| NM_001142800:c.2023+15delT         |                               | <a href="#">6:66005741</a> | A/-     | <a href="#">rs374955689</a> | ALT       |
| NM_001142800:c.1922A>T             | p.Glu641Val                   | <a href="#">6:66005857</a> | T/A     | <a href="#">rs17411795</a>  | REF       |
| NM_001142800:c.1891G>A             | p.Gly631Ser                   | <a href="#">6:66005888</a> | C/T     | <a href="#">rs9342464</a>   | REF       |
| NM_001142800:c.1809C>T             | p.Val603=                     | <a href="#">6:66005970</a> | G/A     | <a href="#">rs9345601</a>   | REF       |
| NM_001142800:c.1767-136T>G         |                               | <a href="#">6:66006148</a> | A/C     | <a href="#">rs9342465</a>   | REF       |
| NM_001142800:c.1766+6309T>C        |                               | <a href="#">6:66038564</a> | A/G     | <a href="#">rs61283975</a>  | ALT       |
| NM_001142800:c.1766+6255C>T        |                               | <a href="#">6:66038618</a> | G/A     | <a href="#">rs1827476</a>   | ALT       |
| NM_001142800:c.1766+5997G>A        |                               | <a href="#">6:66038876</a> | C/T     | <a href="#">rs35176562</a>  | REF       |
| NM_001142800:c.1766+5933T>A        |                               | <a href="#">6:66038940</a> | A/T     | <a href="#">rs114665982</a> | ALT       |
| NM_001142800:c.1766+5415C>T        |                               | <a href="#">6:66039458</a> | G/A     | <a href="#">rs9354227</a>   | ALT       |
| NM_001142800:c.1766+5272C>T        |                               | <a href="#">6:66039601</a> | G/A     | <a href="#">rs9354228</a>   | REF       |
| NM_001142800:c.1766+4413G>T        |                               | <a href="#">6:66040460</a> | C/A     | <a href="#">rs1502967</a>   | ALT       |
| NM_001142800:c.1766+4320G>A        |                               | <a href="#">6:66040553</a> | C/T     | <a href="#">rs7755788</a>   | ALT       |
| NM_001142800:c.1766+3945A>G        |                               | <a href="#">6:66040928</a> | T/C     | <a href="#">rs71572524</a>  | REF       |

Table S6

|                               |              |                            |     |                             |     |
|-------------------------------|--------------|----------------------------|-----|-----------------------------|-----|
| NM_001142800:c.1766+3639T>C   |              | <a href="#">6:66041234</a> | A/G | <a href="#">rs4710516</a>   | REF |
| NM_001142800:c.1766+3630G>A   |              | <a href="#">6:66041243</a> | C/T | <a href="#">rs34794632</a>  | REF |
| NM_001142800:c.1766+3555C>A   |              | <a href="#">6:66041318</a> | G/T | <a href="#">rs4710517</a>   | REF |
| NM_001142800:c.1766+2878C>T   |              | <a href="#">6:66041995</a> | G/A | <a href="#">rs12212303</a>  | ALT |
| NM_001142800:c.1766+2642A>C   |              | <a href="#">6:66042231</a> | T/G | <a href="#">rs12207746</a>  | ALT |
| NM_001142800:c.1766+1153T>G   |              | <a href="#">6:66043720</a> | A/C | <a href="#">rs9360123</a>   | REF |
| NM_001142800:c.1766+1065dupA  |              | <a href="#">6:66043808</a> | -/T | <a href="#">rs148046154</a> | ALT |
| NM_001142800:c.1766+61A>G     |              | <a href="#">6:66044812</a> | T/C | <a href="#">rs76148513</a>  | ALT |
| NM_001142800:c.1600-38G>A     |              | <a href="#">6:66045077</a> | C/T | <a href="#">rs1502965</a>   | ALT |
| NM_001142800:c.1600-79A>G     |              | <a href="#">6:66045118</a> | T/C | <a href="#">rs1502964</a>   | ALT |
| NM_001142800:c.1599+96A>C     |              | <a href="#">6:66053835</a> | T/G | <a href="#">rs1502963</a>   | ALT |
| NM_001142800:c.1300-3C>T      |              | <a href="#">6:66063513</a> | G/A | <a href="#">rs1936439</a>   | ALT |
| NM_001142800:c.1146T>C        | p.Asn382=    | <a href="#">6:66112409</a> | A/G | <a href="#">rs9741110</a>   | REF |
| NM_001142800:c.862+87T>C      |              | <a href="#">6:66200400</a> | A/G | <a href="#">rs4710522</a>   | REF |
| NM_001142800:c.748+225G>A     |              | <a href="#">6:66204331</a> | C/T | <a href="#">rs35009856</a>  | REF |
| NM_001142800:c.359C>T         | p.Thr120Met  | <a href="#">6:66204945</a> | G/A | <a href="#">rs12193967</a>  | ALT |
| NM_001142800:c.232delT        | p.Cys78Alafs | <a href="#">6:66205072</a> | A/- |                             | ALT |
| NM_001142800:c.-198+83T>A     |              | <a href="#">6:66205669</a> | A/T | <a href="#">rs13217899</a>  | REF |
| NM_001142800:c.-332-1124A>G   |              | <a href="#">6:66207010</a> | T/C | <a href="#">rs12193142</a>  | ALT |
| NM_001142800:c.-332-1332T>C   |              | <a href="#">6:66207218</a> | A/G | <a href="#">rs10944813</a>  | ALT |
| NM_001142800:c.-332-2668delT  |              | <a href="#">6:66208554</a> | A/- | <a href="#">rs201814171</a> | ALT |
| NM_001142800:c.-332-2745A>G   |              | <a href="#">6:66208631</a> | T/C | <a href="#">rs4710523</a>   | REF |
| NM_001142800:c.-332-2748A>G   |              | <a href="#">6:66208634</a> | T/C | <a href="#">rs9345642</a>   | ALT |
| NM_001142800:c.-332-4926A>G   |              | <a href="#">6:66210812</a> | T/C | <a href="#">rs9360133</a>   | ALT |
| NM_001142800:c.-332-5141A>C   |              | <a href="#">6:66211027</a> | T/G | <a href="#">rs13193142</a>  | REF |
| NM_001142800:c.-332-5493G>A   |              | <a href="#">6:66211379</a> | C/T | <a href="#">rs3904332</a>   | ALT |
| NM_001142800:c.-332-7111T>A   |              | <a href="#">6:66212997</a> | A/T | <a href="#">rs34706159</a>  | REF |
| NM_001142800:c.-332-7760C>T   |              | <a href="#">6:66213646</a> | G/A | <a href="#">rs4710292</a>   | ALT |
| NM_001142800:c.-332-8122G>A   |              | <a href="#">6:66214008</a> | C/T | <a href="#">rs4710524</a>   | ALT |
| NM_001142800:c.-332-8216A>T   |              | <a href="#">6:66214102</a> | T/A | <a href="#">rs4710293</a>   | REF |
| NM_001142800:c.-332-8220delT  |              | <a href="#">6:66214106</a> | A/- | <a href="#">rs77754448</a>  | ALT |
| NM_001142800:c.-332-8667T>A   |              | <a href="#">6:66214553</a> | A/T | <a href="#">rs9345643</a>   | ALT |
| NM_001142800:c.-332-8831C>T   |              | <a href="#">6:66214717</a> | G/A | <a href="#">rs9363380</a>   | ALT |
| NM_001142800:c.-332-9451C>G   |              | <a href="#">6:66215337</a> | G/C | <a href="#">rs1576638</a>   | ALT |
| NM_001142800:c.-332-9663C>T   |              | <a href="#">6:66215549</a> | G/A | <a href="#">rs7449561</a>   | ALT |
| NM_001142800:c.-332-10150C>G  |              | <a href="#">6:66216036</a> | G/C | <a href="#">rs9351508</a>   | ALT |
| NM_001142800:c.-332-10655dupA |              | <a href="#">6:66216541</a> | -/T | <a href="#">rs35607551</a>  | ALT |
| NM_001142800:c.-332-11104A>G  |              | <a href="#">6:66216990</a> | T/C | <a href="#">rs9360134</a>   | ALT |
| NM_001142800:c.-332-11649T>C  |              | <a href="#">6:66217535</a> | A/G | <a href="#">rs1576639</a>   | ALT |
| NM_001142800:c.-332-11749G>C  |              | <a href="#">6:66217635</a> | C/G | <a href="#">rs9345644</a>   | ALT |
| NM_001142800:c.-332-12670delT |              | <a href="#">6:66218556</a> | A/- | <a href="#">rs35302193</a>  | O/1 |
| NM_001142800:c.-332-12688C>T  |              | <a href="#">6:66218574</a> | G/A |                             | REF |
| NM_001142800:c.-332-12692C>T  |              | <a href="#">6:66218578</a> | G/A |                             | REF |
| NM_001142800:c.-332-13032T>G  |              | <a href="#">6:66218918</a> | A/C | <a href="#">rs9363381</a>   | ALT |
| NM_001142800:c.-332-13085G>A  |              | <a href="#">6:66218971</a> | C/T | <a href="#">rs6924402</a>   | ALT |
| NM_001142800:c.-332-13209C>G  |              | <a href="#">6:66219095</a> | G/C | <a href="#">rs7759568</a>   | ALT |
| NM_001142800:c.-332-13935G>A  |              | <a href="#">6:66219821</a> | C/T | <a href="#">rs60010253</a>  | REF |
| NM_001142800:c.-332-13954G>T  |              | <a href="#">6:66219840</a> | C/A | <a href="#">rs9363382</a>   | ALT |



Table S6

|                               |                            |     |                             |     |
|-------------------------------|----------------------------|-----|-----------------------------|-----|
| NM_001142800:c.-332-14016dupA | <a href="#">6:66219902</a> | -/T | <a href="#">rs112450408</a> | REF |
| NM_001142800:c.-332-14352T>G  | <a href="#">6:66220238</a> | A/C |                             | REF |
| NM_001142800:c.-332-14359dupA | <a href="#">6:66220245</a> | -/T |                             | REF |
| NM_001142800:c.-332-14399C>G  | <a href="#">6:66220285</a> | G/C |                             | REF |
| NM_001142800:c.-332-15373A>T  | <a href="#">6:66221259</a> | T/A | <a href="#">rs6931758</a>   | O/1 |
| NM_001142800:c.-332-16016C>T  | <a href="#">6:66221902</a> | G/A |                             | REF |
| NM_001142800:c.-332-16093T>G  | <a href="#">6:66221979</a> | A/C | <a href="#">rs2882615</a>   | ALT |
| NM_001142800:c.-332-19729T>C  | <a href="#">6:66225615</a> | A/G |                             | REF |
| NM_001142800:c.-332-19754G>T  | <a href="#">6:66225640</a> | C/A | <a href="#">rs12199163</a>  | ALT |
| NM_001142800:c.-332-19758G>A  | <a href="#">6:66225644</a> | C/T |                             | REF |
| NM_001142800:c.-332-19960T>C  | <a href="#">6:66225846</a> | A/G | <a href="#">rs138927014</a> | REF |
| NM_001142800:c.-332-20197C>T  | <a href="#">6:66226083</a> | G/A | <a href="#">rs11759352</a>  | REF |
| NM_001142800:c.-332-20453T>C  | <a href="#">6:66226339</a> | A/G | <a href="#">rs7751898</a>   | REF |
| NM_001142800:c.-332-20695T>G  | <a href="#">6:66226581</a> | A/C | <a href="#">rs7752247</a>   | REF |
| NM_001142800:c.-332-20996A>T  | <a href="#">6:66226882</a> | T/A | <a href="#">rs13208352</a>  | REF |
| NM_001142800:c.-332-21349dupT | <a href="#">6:66227235</a> | -/A | <a href="#">rs71002314</a>  | 1/. |
| NM_001142800:c.-332-21366A>G  | <a href="#">6:66227252</a> | T/C | <a href="#">rs3846800</a>   | ALT |
| NM_001142800:c.-332-23352C>A  | <a href="#">6:66229238</a> | G/T |                             | REF |
| NM_001142800:c.-332-23600A>T  | <a href="#">6:66229486</a> | T/A | <a href="#">rs9453315</a>   | REF |
| NM_001142800:c.-332-23752A>G  | <a href="#">6:66229638</a> | T/C | <a href="#">rs9445551</a>   | REF |
| NM_001142800:c.-332-23899dupA | <a href="#">6:66229785</a> | -/T |                             | O/1 |
| NM_001142800:c.-332-23899delA | <a href="#">6:66229785</a> | T/- | <a href="#">rs34941445</a>  | REF |
| NM_001142800:c.-332-23901A>T  | <a href="#">6:66229787</a> | T/A | <a href="#">rs34303504</a>  | REF |
| NM_001142800:c.-332-24340C>T  | <a href="#">6:66230226</a> | G/A | <a href="#">rs9342483</a>   | REF |
| NM_001142800:c.-332-25178T>C  | <a href="#">6:66231064</a> | A/G | <a href="#">rs7749840</a>   | ALT |
| NM_001142800:c.-332-26229A>G  | <a href="#">6:66232115</a> | T/C | <a href="#">rs4710294</a>   | REF |
| NM_001142800:c.-332-26634T>G  | <a href="#">6:66232520</a> | A/C | <a href="#">rs1884374</a>   | REF |
| NM_001142800:c.-332-26702C>T  | <a href="#">6:66232588</a> | G/A | <a href="#">rs1884373</a>   | REF |
| NM_001142800:c.-332-26712A>C  | <a href="#">6:66232598</a> | T/G | <a href="#">rs1884372</a>   | REF |
| NM_001142800:c.-332-26750A>T  | <a href="#">6:66232636</a> | T/A | <a href="#">rs13208103</a>  | REF |
| NM_001142800:c.-332-27007G>A  | <a href="#">6:66232893</a> | C/T | <a href="#">rs9445553</a>   | REF |
| NM_001142800:c.-332-27662C>G  | <a href="#">6:66233548</a> | G/C | <a href="#">rs9445554</a>   | REF |
| NM_001142800:c.-332-27708C>A  | <a href="#">6:66233594</a> | G/T | <a href="#">rs9354259</a>   | REF |
| NM_001142800:c.-332-28171T>A  | <a href="#">6:66234057</a> | A/T | <a href="#">rs35348004</a>  | REF |
| NM_001142800:c.-332-28851T>A  | <a href="#">6:66234737</a> | A/T | <a href="#">rs9363384</a>   | REF |
| NM_001142800:c.-332-28935C>T  | <a href="#">6:66234821</a> | G/A | <a href="#">rs9354260</a>   | REF |
| NM_001142800:c.-332-29063dupA | <a href="#">6:66234949</a> | -/T | <a href="#">rs200412074</a> | O/1 |
| NM_001142800:c.-332-29329G>C  | <a href="#">6:66235215</a> | C/G | <a href="#">rs9363385</a>   | REF |
| NM_001142800:c.-332-29421G>A  | <a href="#">6:66235307</a> | C/T | <a href="#">rs9453319</a>   | REF |
| NM_001142800:c.-332-29593A>C  | <a href="#">6:66235479</a> | T/G | <a href="#">rs9354261</a>   | ALT |
| NM_001142800:c.-332-30087G>C  | <a href="#">6:66235973</a> | C/G | <a href="#">rs4710295</a>   | REF |
| NM_001142800:c.-332-30174G>A  | <a href="#">6:66236060</a> | C/T | <a href="#">rs4710296</a>   | REF |
| NM_001142800:c.-332-30224A>T  | <a href="#">6:66236110</a> | T/A | <a href="#">rs7742748</a>   | REF |
| NM_001142800:c.-332-30594G>A  | <a href="#">6:66236480</a> | C/T | <a href="#">rs1929326</a>   | REF |

Table S6

|                               |                            |     |                             |     |
|-------------------------------|----------------------------|-----|-----------------------------|-----|
| NM_001142800:c.-332-30672C>T  | <a href="#">6:66236558</a> | G/A | <a href="#">rs10944814</a>  | ALT |
| NM_001142800:c.-332-30674C>A  | <a href="#">6:66236560</a> | G/T | <a href="#">rs1929327</a>   | REF |
| NM_001142800:c.-332-31374C>G  | <a href="#">6:66237260</a> | G/C | <a href="#">rs1929328</a>   | REF |
| NM_001142800:c.-332-31423T>C  | <a href="#">6:66237309</a> | A/G | <a href="#">rs1034137</a>   | ALT |
| NM_001142800:c.-332-31532A>G  | <a href="#">6:66237418</a> | T/C | <a href="#">rs9345645</a>   | ALT |
| NM_001142800:c.-332-31951C>T  | <a href="#">6:66237837</a> | G/A | <a href="#">rs35052047</a>  | REF |
| NM_001142800:c.-332-32049G>A  | <a href="#">6:66237935</a> | C/T | <a href="#">rs2024792</a>   | ALT |
| NM_001142800:c.-332-32434G>A  | <a href="#">6:66238320</a> | C/T | <a href="#">rs7768271</a>   | REF |
| NM_001142800:c.-332-33086G>A  | <a href="#">6:66238972</a> | C/T | <a href="#">rs10484938</a>  | REF |
| NM_001142800:c.-332-33147dupT | <a href="#">6:66239033</a> | -/A |                             | REF |
| NM_001142800:c.-332-34141T>G  | <a href="#">6:66240027</a> | A/C | <a href="#">rs9363386</a>   | ALT |
| NM_001142800:c.-332-34510T>A  | <a href="#">6:66240396</a> | A/T | <a href="#">rs10484937</a>  | REF |
| NM_001142800:c.-332-34831G>A  | <a href="#">6:66240717</a> | C/T | <a href="#">rs9453321</a>   | REF |
| NM_001142800:c.-332-34976A>G  | <a href="#">6:66240862</a> | T/C | <a href="#">rs7740699</a>   | ALT |
| NM_001142800:c.-332-35001A>G  | <a href="#">6:66240887</a> | T/C | <a href="#">rs9354262</a>   | REF |
| NM_001142800:c.-332-35300T>A  | <a href="#">6:66241186</a> | A/T | <a href="#">rs7775434</a>   | REF |
| NM_001142800:c.-332-35696G>C  | <a href="#">6:66241582</a> | C/G | <a href="#">rs7756463</a>   | REF |
| NM_001142800:c.-332-35718T>C  | <a href="#">6:66241604</a> | A/G | <a href="#">rs7776123</a>   | REF |
| NM_001142800:c.-332-35922C>G  | <a href="#">6:66241808</a> | G/C | <a href="#">rs11963174</a>  | REF |
| NM_001142800:c.-332-36743T>C  | <a href="#">6:66242629</a> | A/G | <a href="#">rs66608147</a>  | REF |
| NM_001142800:c.-332-36992A>G  | <a href="#">6:66242878</a> | T/C | <a href="#">rs10484936</a>  | REF |
| NM_001142800:c.-332-36996G>A  | <a href="#">6:66242882</a> | C/T | <a href="#">rs2351260</a>   | ALT |
| NM_001142800:c.-332-37235G>A  | <a href="#">6:66243121</a> | C/T |                             | REF |
| NM_001142800:c.-332-37239A>C  | <a href="#">6:66243125</a> | T/G |                             | REF |
| NM_001142800:c.-332-37430G>A  | <a href="#">6:66243316</a> | C/T | <a href="#">rs62407706</a>  | REF |
| NM_001142800:c.-332-37483G>C  | <a href="#">6:66243369</a> | C/G | <a href="#">rs115897734</a> | REF |
| NM_001142800:c.-332-37524C>G  | <a href="#">6:66243410</a> | G/C |                             | REF |
| NM_001142800:c.-332-37535A>G  | <a href="#">6:66243421</a> | T/C |                             | REF |
| NM_001142800:c.-332-37981dupA | <a href="#">6:66243867</a> | -/T |                             | REF |
| NM_001142800:c.-332-38237G>A  | <a href="#">6:66244123</a> | C/T | <a href="#">rs1831476</a>   | REF |
| NM_001142800:c.-332-40332dupA | <a href="#">6:66246218</a> | -/T |                             | 0/1 |
| NM_001142800:c.-332-40332delA | <a href="#">6:66246218</a> | T/- | <a href="#">rs71864647</a>  | REF |
| NM_001142800:c.-332-40724G>A  | <a href="#">6:66246610</a> | C/T | <a href="#">rs1929330</a>   | REF |
| NM_001142800:c.-332-40939C>T  | <a href="#">6:66246825</a> | G/A | <a href="#">rs7744348</a>   | REF |
| NM_001142800:c.-332-41153C>T  | <a href="#">6:66247039</a> | G/A |                             | REF |
| NM_001142800:c.-332-41164G>A  | <a href="#">6:66247050</a> | C/T |                             | REF |
| NM_001142800:c.-332-41165C>T  | <a href="#">6:66247051</a> | G/A | <a href="#">rs9294641</a>   | REF |
| NM_001142800:c.-332-41643T>G  | <a href="#">6:66247529</a> | A/C | <a href="#">rs2210338</a>   | ALT |
| NM_001142800:c.-332-41717A>G  | <a href="#">6:66247603</a> | T/C | <a href="#">rs9294642</a>   | REF |
| NM_001142800:c.-332-42339A>C  | <a href="#">6:66248225</a> | T/G | <a href="#">rs2039311</a>   | ALT |
| NM_001142800:c.-332-42401T>C  | <a href="#">6:66248287</a> | A/G | <a href="#">rs9363387</a>   | REF |
| NM_001142800:c.-332-42464C>G  | <a href="#">6:66248350</a> | G/C | <a href="#">rs9354263</a>   | REF |
| NM_001142800:c.-332-42538A>G  | <a href="#">6:66248424</a> | T/C | <a href="#">rs1411850</a>   | REF |
| NM_001142800:c.-332-42573A>G  | <a href="#">6:66248459</a> | T/C | <a href="#">rs12175029</a>  | ALT |
| NM_001142800:c.-332-42984T>A  | <a href="#">6:66248870</a> | A/T | <a href="#">rs9351509</a>   | ALT |
| NM_001142800:c.-332-43299G>A  | <a href="#">6:66249185</a> | C/T | <a href="#">rs115439766</a> | ALT |

Table S6

|                               |                            |     |                             |     |
|-------------------------------|----------------------------|-----|-----------------------------|-----|
| NM_001142800:c.-332-43500C>T  | <a href="#">6:66249386</a> | G/A | <a href="#">rs6923660</a>   | REF |
| NM_001142800:c.-332-43614A>G  | <a href="#">6:66249500</a> | T/C | <a href="#">rs16896814</a>  | REF |
| NM_001142800:c.-332-43724A>G  | <a href="#">6:66249610</a> | T/C | <a href="#">rs6909236</a>   | ALT |
| NM_001142800:c.-332-43938G>T  | <a href="#">6:66249824</a> | C/A | <a href="#">rs1331200</a>   | REF |
| NM_001142800:c.-332-44011C>T  | <a href="#">6:66249897</a> | G/A | <a href="#">rs1331202</a>   | ALT |
| NM_001142800:c.-332-44857C>T  | <a href="#">6:66250743</a> | G/A | <a href="#">rs10944815</a>  | ALT |
| NM_001142800:c.-332-44966G>A  | <a href="#">6:66250852</a> | C/T | <a href="#">rs6904086</a>   | ALT |
| NM_001142800:c.-332-45071A>G  | <a href="#">6:66250957</a> | T/C | <a href="#">rs2039312</a>   | ALT |
| NM_001142800:c.-332-45095dupA | <a href="#">6:66250981</a> | -/T | <a href="#">rs35370331</a>  | ALT |
| NM_001142800:c.-332-45202T>C  | <a href="#">6:66251088</a> | A/G | <a href="#">rs1543666</a>   | ALT |
| NM_001142800:c.-332-45415delA | <a href="#">6:66251301</a> | T/- | <a href="#">rs5876967</a>   | ALT |
| NM_001142800:c.-332-45666delT | <a href="#">6:66251552</a> | A/- | <a href="#">rs71553518</a>  | REF |
| NM_001142800:c.-332-45724A>C  | <a href="#">6:66251610</a> | T/G | <a href="#">rs1556391</a>   | REF |
| NM_001142800:c.-332-45743C>T  | <a href="#">6:66251629</a> | G/A | <a href="#">rs1556392</a>   | ALT |
| NM_001142800:c.-332-45871C>T  | <a href="#">6:66251757</a> | G/A | <a href="#">rs9342484</a>   | ALT |
| NM_001142800:c.-332-46044A>G  | <a href="#">6:66251930</a> | T/C | <a href="#">rs1556394</a>   | REF |
| NM_001142800:c.-332-46099A>G  | <a href="#">6:66251985</a> | T/C | <a href="#">rs16896824</a>  | REF |
| NM_001142800:c.-332-46114A>G  | <a href="#">6:66252000</a> | T/C | <a href="#">rs9363388</a>   | REF |
| NM_001142800:c.-332-46125T>A  | <a href="#">6:66252011</a> | A/T | <a href="#">rs9363389</a>   | REF |
| NM_001142800:c.-332-46134T>A  | <a href="#">6:66252020</a> | A/T | <a href="#">rs9345647</a>   | ALT |
| NM_001142800:c.-332-46875A>G  | <a href="#">6:66252761</a> | T/C | <a href="#">rs16896825</a>  | REF |
| NM_001142800:c.-332-47274T>C  | <a href="#">6:66253160</a> | A/G | <a href="#">rs6939055</a>   | ALT |
| NM_001142800:c.-332-47390T>C  | <a href="#">6:66253276</a> | A/G | <a href="#">rs6939243</a>   | ALT |
| NM_001142800:c.-332-47995G>A  | <a href="#">6:66253881</a> | C/T | <a href="#">rs6922236</a>   | ALT |
| NM_001142800:c.-332-48038T>A  | <a href="#">6:66253924</a> | A/T | <a href="#">rs5008809</a>   | 0/1 |
| NM_001142800:c.-332-48040T>A  | <a href="#">6:66253926</a> | A/T | <a href="#">rs5008810</a>   | 0/1 |
| NM_001142800:c.-332-48198A>G  | <a href="#">6:66254084</a> | T/C | <a href="#">rs1411856</a>   | ALT |
| NM_001142800:c.-332-48281G>A  | <a href="#">6:66254167</a> | C/T | <a href="#">rs1411857</a>   | ALT |
| NM_001142800:c.-332-48414A>G  | <a href="#">6:66254300</a> | T/C | <a href="#">rs1411858</a>   | ALT |
| NM_001142800:c.-332-48421G>A  | <a href="#">6:66254307</a> | C/T | <a href="#">rs1411859</a>   | ALT |
| NM_001142800:c.-332-48440A>G  | <a href="#">6:66254326</a> | T/C | <a href="#">rs5001652</a>   | REF |
| NM_001142800:c.-332-48515G>A  | <a href="#">6:66254401</a> | C/T | <a href="#">rs4501413</a>   | ALT |
| NM_001142800:c.-332-48974T>C  | <a href="#">6:66254860</a> | A/G | <a href="#">rs1331208</a>   | ALT |
| NM_001142800:c.-332-49181G>A  | <a href="#">6:66255067</a> | C/T | <a href="#">rs2351261</a>   | ALT |
| NM_001142800:c.-332-49526T>C  | <a href="#">6:66255412</a> | A/G | <a href="#">rs1331209</a>   | ALT |
| NM_001142800:c.-332-49676G>A  | <a href="#">6:66255562</a> | C/T | <a href="#">rs1331210</a>   | ALT |
| NM_001142800:c.-332-49701G>T  | <a href="#">6:66255587</a> | C/A | <a href="#">rs1331211</a>   | ALT |
| NM_001142800:c.-332-49902G>T  | <a href="#">6:66255788</a> | C/A | <a href="#">rs972709</a>    | ALT |
| NM_001142800:c.-332-50031C>A  | <a href="#">6:66255917</a> | G/T | <a href="#">rs972710</a>    | ALT |
| NM_001142800:c.-332-50066T>C  | <a href="#">6:66255952</a> | A/G | <a href="#">rs972711</a>    | ALT |
| NM_001142800:c.-332-50193delA | <a href="#">6:66256079</a> | T/- | <a href="#">rs5876969</a>   | REF |
| NM_001142800:c.-332-50267G>A  | <a href="#">6:66256153</a> | C/T | <a href="#">rs972712</a>    | ALT |
| NM_001142800:c.-332-50329delA | <a href="#">6:66256215</a> | T/- | <a href="#">rs111400363</a> | ALT |
| NM_001142800:c.-332-50537G>T  | <a href="#">6:66256423</a> | C/A | <a href="#">rs9345648</a>   | REF |
| NM_001142800:c.-332-50581dupA | <a href="#">6:66256467</a> | -/T | <a href="#">rs11396973</a>  | ALT |

Table S6

|                               |                            |     |                            |     |
|-------------------------------|----------------------------|-----|----------------------------|-----|
| NM_001142800:c.-332-50634T>C  | <a href="#">6:66256520</a> | A/G | <a href="#">rs6914700</a>  | ALT |
| NM_001142800:c.-332-50751A>G  | <a href="#">6:66256637</a> | T/C | <a href="#">rs6919610</a>  | REF |
| NM_001142800:c.-332-50864C>T  | <a href="#">6:66256750</a> | G/A | <a href="#">rs34586455</a> | REF |
| NM_001142800:c.-332-51310T>C  | <a href="#">6:66257196</a> | A/G | <a href="#">rs9363391</a>  | ALT |
| NM_001142800:c.-332-52016T>A  | <a href="#">6:66257902</a> | A/T | <a href="#">rs1411839</a>  | ALT |
| NM_001142800:c.-332-52081C>T  | <a href="#">6:66257967</a> | G/A | <a href="#">rs1411840</a>  | REF |
| NM_001142800:c.-332-52214A>G  | <a href="#">6:66258100</a> | T/C | <a href="#">rs2351262</a>  | ALT |
| NM_001142800:c.-332-52293T>G  | <a href="#">6:66258179</a> | A/C | <a href="#">rs1411841</a>  | ALT |
| NM_001142800:c.-332-52347C>T  | <a href="#">6:66258233</a> | G/A | <a href="#">rs1929331</a>  | ALT |
| NM_001142800:c.-332-52717T>A  | <a href="#">6:66258603</a> | A/T | <a href="#">rs1929332</a>  | ALT |
| NM_001142800:c.-332-52736G>C  | <a href="#">6:66258622</a> | C/G | <a href="#">rs1929333</a>  | ALT |
| NM_001142800:c.-332-52765G>A  | <a href="#">6:66258651</a> | C/T | <a href="#">rs1929334</a>  | ALT |
| NM_001142800:c.-332-52892A>G  | <a href="#">6:66258778</a> | T/C | <a href="#">rs1331197</a>  | ALT |
| NM_001142800:c.-332-53065G>T  | <a href="#">6:66258951</a> | C/A | <a href="#">rs9363392</a>  | ALT |
| NM_001142800:c.-332-53332C>A  | <a href="#">6:66259218</a> | G/T | <a href="#">rs76838586</a> | REF |
| NM_001142800:c.-332-53472A>G  | <a href="#">6:66259358</a> | T/C | <a href="#">rs6937452</a>  | ALT |
| NM_001142800:c.-332-53524A>C  | <a href="#">6:66259410</a> | T/G | <a href="#">rs6937478</a>  | ALT |
| NM_001142800:c.-332-53535C>T  | <a href="#">6:66259421</a> | G/A | <a href="#">rs6455046</a>  | ALT |
| NM_001142800:c.-332-53622T>C  | <a href="#">6:66259508</a> | A/G | <a href="#">rs6932966</a>  | ALT |
| NM_001142800:c.-332-53651C>T  | <a href="#">6:66259537</a> | G/A | <a href="#">rs6909711</a>  | ALT |
| NM_001142800:c.-332-53660T>C  | <a href="#">6:66259546</a> | A/G | <a href="#">rs6455047</a>  | REF |
| NM_001142800:c.-332-53827C>T  | <a href="#">6:66259713</a> | G/A | <a href="#">rs9354264</a>  | ALT |
| NM_001142800:c.-332-53945A>G  | <a href="#">6:66259831</a> | T/C | <a href="#">rs2351263</a>  | ALT |
| NM_001142800:c.-332-53995G>A  | <a href="#">6:66259881</a> | C/T | <a href="#">rs9345649</a>  | ALT |
| NM_001142800:c.-332-54005A>G  | <a href="#">6:66259891</a> | T/C | <a href="#">rs2351264</a>  | ALT |
| NM_001142800:c.-332-54305dupA | <a href="#">6:66260191</a> | -/T |                            | REF |
| NM_001142800:c.-332-54343dupA | <a href="#">6:66260229</a> | -/T |                            | REF |
| NM_001142800:c.-332-54347dupA | <a href="#">6:66260233</a> | -/T |                            | REF |
| NM_001142800:c.-332-54351A>T  | <a href="#">6:66260237</a> | T/A |                            | REF |
| NM_001142800:c.-332-54353A>T  | <a href="#">6:66260239</a> | T/A |                            | REF |
| NM_001142800:c.-332-56170C>T  | <a href="#">6:66262056</a> | G/A | <a href="#">rs4507566</a>  | ALT |
| NM_001142800:c.-332-56229T>G  | <a href="#">6:66262115</a> | A/C | <a href="#">rs4460199</a>  | ALT |
| NM_001142800:c.-332-56346C>T  | <a href="#">6:66262232</a> | G/A | <a href="#">rs4524589</a>  | ALT |
| NM_001142800:c.-332-56445A>C  | <a href="#">6:66262331</a> | T/G | <a href="#">rs9453326</a>  | ALT |
| NM_001142800:c.-332-56452C>T  | <a href="#">6:66262338</a> | G/A | <a href="#">rs9363393</a>  | ALT |
| NM_001142800:c.-332-56520A>G  | <a href="#">6:66262406</a> | T/C | <a href="#">rs4506027</a>  | ALT |
| NM_001142800:c.-332-56615A>T  | <a href="#">6:66262501</a> | T/A | <a href="#">rs9342485</a>  | ALT |
| NM_001142800:c.-332-56720T>G  | <a href="#">6:66262606</a> | A/C | <a href="#">rs9360135</a>  | ALT |
| NM_001142800:c.-332-56809A>G  | <a href="#">6:66262695</a> | T/C | <a href="#">rs9345650</a>  | ALT |
| NM_001142800:c.-332-56834C>T  | <a href="#">6:66262720</a> | G/A | <a href="#">rs3908650</a>  | ALT |
| NM_001142800:c.-332-56933A>G  | <a href="#">6:66262819</a> | T/C | <a href="#">rs3908651</a>  | ALT |
| NM_001142800:c.-332-56935C>T  | <a href="#">6:66262821</a> | G/A | <a href="#">rs9363394</a>  | ALT |
| NM_001142800:c.-332-57162G>A  | <a href="#">6:66263048</a> | C/T | <a href="#">rs3908652</a>  | ALT |
| NM_001142800:c.-332-57335T>C  | <a href="#">6:66263221</a> | A/G | <a href="#">rs7452712</a>  | ALT |
| NM_001142800:c.-332-57368T>G  | <a href="#">6:66263254</a> | A/C | <a href="#">rs9354265</a>  | ALT |
| NM_001142800:c.-332-57696A>T  | <a href="#">6:66263582</a> | T/A | <a href="#">rs3846802</a>  | ALT |
| NM_001142800:c.-332-57768A>G  | <a href="#">6:66263654</a> | T/C | <a href="#">rs3857534</a>  | ALT |

Table S6

|                               |                            |     |                             |     |
|-------------------------------|----------------------------|-----|-----------------------------|-----|
| NM_001142800:c.-332-57852G>T  | <a href="#">6:66263738</a> | C/A | <a href="#">rs3857535</a>   | REF |
| NM_001142800:c.-332-58098G>A  | <a href="#">6:66263984</a> | C/T | <a href="#">rs2150618</a>   | ALT |
| NM_001142800:c.-332-58293G>A  | <a href="#">6:66264179</a> | C/T | <a href="#">rs2150619</a>   | ALT |
| NM_001142800:c.-332-58500T>A  | <a href="#">6:66264386</a> | A/T | <a href="#">rs2351265</a>   | ALT |
| NM_001142800:c.-332-58552A>C  | <a href="#">6:66264438</a> | T/G | <a href="#">rs6935790</a>   | ALT |
| NM_001142800:c.-332-58621T>C  | <a href="#">6:66264507</a> | A/G | <a href="#">rs1411847</a>   | ALT |
| NM_001142800:c.-332-58849A>G  | <a href="#">6:66264735</a> | T/C | <a href="#">rs1411848</a>   | ALT |
| NM_001142800:c.-332-58869C>T  | <a href="#">6:66264755</a> | G/A | <a href="#">rs1411849</a>   | ALT |
| NM_001142800:c.-332-59017delT | <a href="#">6:66264903</a> | A/- | <a href="#">rs5876972</a>   | ALT |
| NM_001142800:c.-332-59045T>C  | <a href="#">6:66264931</a> | A/G | <a href="#">rs1929335</a>   | ALT |
| NM_001142800:c.-332-59217A>G  | <a href="#">6:66265103</a> | T/C | <a href="#">rs1929336</a>   | ALT |
| NM_001142800:c.-332-59938T>G  | <a href="#">6:66265824</a> | A/C | <a href="#">rs1999363</a>   | ALT |
| NM_001142800:c.-332-60418T>C  | <a href="#">6:66266304</a> | A/G | <a href="#">rs2351266</a>   | ALT |
| NM_001142800:c.-332-60657A>G  | <a href="#">6:66266543</a> | T/C | <a href="#">rs7743334</a>   | REF |
| NM_001142800:c.-332-60690G>A  | <a href="#">6:66266576</a> | C/T | <a href="#">rs1929337</a>   | ALT |
| NM_001142800:c.-332-61647C>T  | <a href="#">6:66267533</a> | G/A | <a href="#">rs6926034</a>   | ALT |
| NM_001142800:c.-332-61961G>C  | <a href="#">6:66267847</a> | C/G | <a href="#">rs6932247</a>   | ALT |
| NM_001142800:c.-332-62068G>A  | <a href="#">6:66267954</a> | C/T | <a href="#">rs7767609</a>   | REF |
| NM_001142800:c.-332-62297G>A  | <a href="#">6:66268183</a> | C/T | <a href="#">rs9360136</a>   | ALT |
| NM_001142800:c.-332-62310T>C  | <a href="#">6:66268196</a> | A/G | <a href="#">rs1411852</a>   | ALT |
| NM_001142800:c.-332-62543C>T  | <a href="#">6:66268429</a> | G/A | <a href="#">rs1411853</a>   | REF |
| NM_001142800:c.-332-62874C>T  | <a href="#">6:66268760</a> | G/A | <a href="#">rs1473778</a>   | ALT |
| NM_001142800:c.-332-62900A>T  | <a href="#">6:66268786</a> | T/A | <a href="#">rs1473779</a>   | ALT |
| NM_001142800:c.-332-63513T>C  | <a href="#">6:66269399</a> | A/G | <a href="#">rs1331205</a>   | REF |
| NM_001142800:c.-332-63845T>A  | <a href="#">6:66269731</a> | A/T | <a href="#">rs9345651</a>   | ALT |
| NM_001142800:c.-332-64004C>A  | <a href="#">6:66269890</a> | G/T | <a href="#">rs4710526</a>   | ALT |
| NM_001142800:c.-332-64078A>G  | <a href="#">6:66269964</a> | T/C | <a href="#">rs1473780</a>   | ALT |
| NM_001142800:c.-332-64818G>A  | <a href="#">6:66270704</a> | C/T | <a href="#">rs9363395</a>   | ALT |
| NM_001142800:c.-332-65097C>T  | <a href="#">6:66270983</a> | G/A | <a href="#">rs9345652</a>   | REF |
| NM_001142800:c.-332-65268T>G  | <a href="#">6:66271154</a> | A/C | <a href="#">rs1411855</a>   | ALT |
| NM_001142800:c.-332-65514G>T  | <a href="#">6:66271400</a> | C/A | <a href="#">rs2225457</a>   | ALT |
| NM_001142800:c.-332-65551G>A  | <a href="#">6:66271437</a> | C/T | <a href="#">rs13204681</a>  | REF |
| NM_001142800:c.-332-65557G>A  | <a href="#">6:66271443</a> | C/T | <a href="#">rs9363396</a>   | ALT |
| NM_001142800:c.-332-66014C>T  | <a href="#">6:66271900</a> | G/A | <a href="#">rs7349900</a>   | ALT |
| NM_001142800:c.-332-67582dupA | <a href="#">6:66273468</a> | -/T | <a href="#">rs201551142</a> | 0/1 |
| NM_001142800:c.-332-67590T>A  | <a href="#">6:66273476</a> | A/T | <a href="#">rs1331206</a>   | ALT |
| NM_001142800:c.-332-67724A>G  | <a href="#">6:66273610</a> | T/C | <a href="#">rs1331207</a>   | ALT |
| NM_001142800:c.-332-67918A>C  | <a href="#">6:66273804</a> | T/G |                             | REF |
| NM_001142800:c.-332-67921C>T  | <a href="#">6:66273807</a> | G/A |                             | REF |
| NM_001142800:c.-332-67973T>C  | <a href="#">6:66273859</a> | A/G |                             | REF |
| NM_001142800:c.-332-67976T>A  | <a href="#">6:66273862</a> | A/T |                             | REF |
| NM_001142800:c.-332-69675C>A  | <a href="#">6:66275561</a> | G/T | <a href="#">rs55792659</a>  | REF |
| NM_001142800:c.-332-69906A>C  | <a href="#">6:66275792</a> | T/G | <a href="#">rs12198506</a>  | ALT |
| NM_001142800:c.-332-69915G>A  | <a href="#">6:66275801</a> | C/T | <a href="#">rs71572536</a>  | REF |
| NM_001142800:c.-332-70103dupT | <a href="#">6:66275989</a> | -/A | <a href="#">rs368929865</a> | 0/1 |
| NM_001142800:c.-332-70135C>G  | <a href="#">6:66276021</a> | G/C | <a href="#">rs12204695</a>  | ALT |
| NM_001142800:c.-332-70347C>T  | <a href="#">6:66276233</a> | G/A | <a href="#">rs12204856</a>  | ALT |
| NM_001142800:c.-332-70468G>T  | <a href="#">6:66276354</a> | C/A | <a href="#">rs12191952</a>  | ALT |

Table S6

|                                          |                            |     |                                |     |
|------------------------------------------|----------------------------|-----|--------------------------------|-----|
| NM_001142800:c.-332-70670A>T             | <a href="#">6:66276556</a> | T/A | <a href="#">rs62407713</a>     | REF |
| NM_001142800:c.-332-70756T>C             | <a href="#">6:66276642</a> | A/G | <a href="#">rs4314478</a>      | ALT |
| NM_001142800:c.-332-71287G>A             | <a href="#">6:66277173</a> | C/T | <a href="#">rs4235971</a>      | ALT |
| NM_001142800:c.-332-71530C>T             | <a href="#">6:66277416</a> | G/A | <a href="#">rs9342486</a>      | REF |
| NM_001142800:c.-332-71742C>G             | <a href="#">6:66277628</a> | G/C | <a href="#">rs34412399</a>     | REF |
| NM_001142800:c.-333+71756C>A             | <a href="#">6:66277915</a> | G/T | <a href="#">rs7753548</a>      | ALT |
| NM_001142800:c.-333+71469delA            | <a href="#">6:66278202</a> | T/- | <a href="#">rs61492530</a>     | ./1 |
| NM_001142800:c.-333+71096C>T             | <a href="#">6:66278575</a> | G/A | <a href="#">rs13203580</a>     | REF |
| NM_001142800:c.-333+70597G>T             | <a href="#">6:66279074</a> | C/A | <a href="#">rs9345653</a>      | ALT |
| NM_001142800:c.-333+70136G>C             | <a href="#">6:66279535</a> | C/G | <a href="#">rs9345654</a>      | ALT |
| NM_001142800:c.-333+69967C>G             | <a href="#">6:66279704</a> | G/C | <a href="#">rs9363398</a>      | REF |
| NM_001142800:c.-333+69650dupT            | <a href="#">6:66280021</a> | -/A |                                | REF |
| NM_001142800:c.-333+69646delA            | <a href="#">6:66280025</a> | T/- | <a href="#">rs9363399,rs67</a> | 0/1 |
| NM_001142800:c.-333+69646A>T             | <a href="#">6:66280025</a> | T/A | <a href="#">rs9363399,rs67</a> | 0/1 |
| NM_001142800:c.-333+69606T>C             | <a href="#">6:66280065</a> | A/G | <a href="#">rs66812553</a>     | ALT |
| NM_001142800:c.-333+69487T>C             | <a href="#">6:66280184</a> | A/G | <a href="#">rs9360138</a>      | ALT |
| NM_001142800:c.-333+68564G>A             | <a href="#">6:66281107</a> | C/T | <a href="#">rs34268718</a>     | REF |
| NM_001142800:c.-333+68363G>C             | <a href="#">6:66281308</a> | C/G | <a href="#">rs6455048</a>      | REF |
| NM_001142800:c.-333+67794T>C             | <a href="#">6:66281877</a> | A/G | <a href="#">rs12190494</a>     | ALT |
| NM_001142800:c.-333+67447G>A             | <a href="#">6:66282224</a> | C/T | <a href="#">rs6650991</a>      | ALT |
| NM_001142800:c.-333+67298G>A             | <a href="#">6:66282373</a> | C/T | <a href="#">rs1331203</a>      | ALT |
| NM_001142800:c.-333+67285C>G             | <a href="#">6:66282386</a> | G/C | <a href="#">rs1331204</a>      | ALT |
| NM_001142800:c.-333+65971delT            | <a href="#">6:66283700</a> | A/- | <a href="#">rs61328716</a>     | REF |
| NM_001142800:c.-333+65871G>A             | <a href="#">6:66283800</a> | C/T | <a href="#">rs9351510</a>      | REF |
| NM_001142800:c.-333+65485C>T             | <a href="#">6:66284186</a> | G/A | <a href="#">rs9360139</a>      | ALT |
| NM_001142800:c.-333+65425C>G             | <a href="#">6:66284246</a> | G/C | <a href="#">rs9363400</a>      | ALT |
| NM_001142800:c.-333+65421T>A             | <a href="#">6:66284250</a> | A/T | <a href="#">rs1590965</a>      | ALT |
| NM_001142800:c.-333+65029A>G             | <a href="#">6:66284642</a> | T/C | <a href="#">rs76704490</a>     | REF |
| NM_001142800:c.-333+65018C>G             | <a href="#">6:66284653</a> | G/C | <a href="#">rs1590966</a>      | ALT |
| NM_001142800:c.-333+64865T>C             | <a href="#">6:66284806</a> | A/G | <a href="#">rs13328254</a>     | REF |
| NM_001142800:c.-333+64863A>G             | <a href="#">6:66284808</a> | T/C | <a href="#">rs1590967</a>      | REF |
| NM_001142800:c.-333+63980T>C             | <a href="#">6:66285691</a> | A/G | <a href="#">rs9294643</a>      | ALT |
| NM_001142800:c.-333+63713G>A             | <a href="#">6:66285958</a> | C/T | <a href="#">rs9351511</a>      | ALT |
| NM_001142800:c.-333+63615G>C             | <a href="#">6:66286056</a> | C/G | <a href="#">rs354346</a>       | ALT |
| NM_001142800:c.-333+63216A>G             | <a href="#">6:66286455</a> | T/C | <a href="#">rs354347</a>       | ALT |
| NM_001142800:c.-333+63009G>A             | <a href="#">6:66286662</a> | C/T | <a href="#">rs354348</a>       | ALT |
| NM_001142800:c.-333+62748T>A             | <a href="#">6:66286923</a> | A/T | <a href="#">rs10944816</a>     | ALT |
| NM_001142800:c.-333+62306G>T             | <a href="#">6:66287365</a> | C/A | <a href="#">rs354349</a>       | ALT |
| NM_001142800:c.-333+62129A>G             | <a href="#">6:66287542</a> | T/C | <a href="#">rs354350</a>       | ALT |
| NM_001142800:c.-333+62028_-333+62029insT | <a href="#">6:66287643</a> | -/A | <a href="#">rs147331700</a>    | REF |
| NM_001142800:c.-333+62028A>T             | <a href="#">6:66287643</a> | T/A | <a href="#">rs61475327</a>     | REF |
| NM_001142800:c.-333+62027dupT            | <a href="#">6:66287644</a> | -/A | <a href="#">rs61475327</a>     | 1/. |
| NM_001142800:c.-333+61711T>G             | <a href="#">6:66287960</a> | A/C | <a href="#">rs2776773</a>      | ALT |
| NM_001142800:c.-333+61622A>G             | <a href="#">6:66288049</a> | T/C | <a href="#">rs354351</a>       | ALT |
| NM_001142800:c.-333+60997A>G             | <a href="#">6:66288674</a> | T/C | <a href="#">rs354352</a>       | ALT |

Table S6

|                               |                            |     |                                                  |     |
|-------------------------------|----------------------------|-----|--------------------------------------------------|-----|
| NM_001142800:c.-333+60488A>G  | <a href="#">6:66289183</a> | T/C | <a href="#">rs1929338</a>                        | REF |
| NM_001142800:c.-333+58923T>C  | <a href="#">6:66290748</a> | A/G | <a href="#">rs186438553</a>                      | REF |
| NM_001142800:c.-333+58528T>C  | <a href="#">6:66291143</a> | A/G |                                                  | REF |
| NM_001142800:c.-333+57657T>C  | <a href="#">6:66292014</a> | A/G | <a href="#">rs354354</a>                         | ALT |
| NM_001142800:c.-333+55810dupT | <a href="#">6:66293861</a> | -/A |                                                  | REF |
| NM_001142800:c.-333+55810delT | <a href="#">6:66293861</a> | A/- | <a href="#">rs61362090</a>                       | REF |
| NM_001142800:c.-333+54846A>G  | <a href="#">6:66294825</a> | T/C | <a href="#">rs354358</a>                         | ALT |
| NM_001142800:c.-333+53899C>T  | <a href="#">6:66295772</a> | G/A | <a href="#">rs374738</a>                         | ALT |
| NM_001142800:c.-333+53641C>T  | <a href="#">6:66296030</a> | G/A | <a href="#">rs35936441</a>                       | REF |
| NM_001142800:c.-333+53476G>C  | <a href="#">6:66296195</a> | C/G | <a href="#">rs354359</a>                         | ALT |
| NM_001142800:c.-333+52809T>C  | <a href="#">6:66296862</a> | A/G | <a href="#">rs188298223</a>                      | REF |
| NM_001142800:c.-333+51495A>G  | <a href="#">6:66298176</a> | T/C | <a href="#">rs354361</a>                         | ALT |
| NM_001142800:c.-333+51358G>A  | <a href="#">6:66298313</a> | C/T | <a href="#">rs6902867</a>                        | REF |
| NM_001142800:c.-333+51214delA | <a href="#">6:66298457</a> | T/- | <a href="#">rs35933552</a>                       | ALT |
| NM_001142800:c.-333+49538T>C  | <a href="#">6:66300133</a> | A/G | <a href="#">rs13194431</a>                       | REF |
| NM_001142800:c.-333+49184A>G  | <a href="#">6:66300487</a> | T/C | <a href="#">rs34018715</a>                       | REF |
| NM_001142800:c.-333+48967dupA | <a href="#">6:66300704</a> | -/T |                                                  | 0/1 |
| NM_001142800:c.-333+48921dupA | <a href="#">6:66300750</a> | -/T |                                                  | 0/1 |
| NM_001142800:c.-333+48921delA | <a href="#">6:66300750</a> | T/- |                                                  | REF |
| NM_001142800:c.-333+48659G>A  | <a href="#">6:66301012</a> | C/T | <a href="#">rs62407719</a>                       | REF |
| NM_001142800:c.-333+48500A>G  | <a href="#">6:66301171</a> | T/C | <a href="#">rs72882209</a>                       | ALT |
| NM_001142800:c.-333+48461C>G  | <a href="#">6:66301210</a> | G/C | <a href="#">rs115835301</a>                      | ALT |
| NM_001142800:c.-333+48447A>T  | <a href="#">6:66301224</a> | T/A | <a href="#">rs116265847</a>                      | ALT |
| NM_001142800:c.-333+48441G>C  | <a href="#">6:66301230</a> | C/G | <a href="#">rs9363403</a>                        | ALT |
| NM_001142800:c.-333+48228G>A  | <a href="#">6:66301443</a> | C/T | <a href="#">rs12199868</a>                       | ALT |
| NM_001142800:c.-333+47764T>G  | <a href="#">6:66301907</a> | A/C | <a href="#">rs354362</a>                         | ALT |
| NM_001142800:c.-333+47719T>C  | <a href="#">6:66301952</a> | A/G | <a href="#">rs9351513</a>                        | REF |
| NM_001142800:c.-333+46534A>G  | <a href="#">6:66303137</a> | T/C | <a href="#">rs16896892</a>                       | REF |
| NM_001142800:c.-333+45977C>T  | <a href="#">6:66303694</a> | G/A | <a href="#">rs354363</a>                         | ALT |
| NM_001142800:c.-333+45508A>G  | <a href="#">6:66304163</a> | T/C | <a href="#">rs354364</a>                         | REF |
| NM_001142800:c.-333+45211A>G  | <a href="#">6:66304460</a> | T/C | <a href="#">rs354365</a>                         | ALT |
| NM_001142800:c.-333+45155A>G  | <a href="#">6:66304516</a> | T/C |                                                  | REF |
| NM_001142800:c.-333+44604T>A  | <a href="#">6:66305067</a> | A/T | <a href="#">rs13215741</a>                       | REF |
| NM_001142800:c.-333+44308delT | <a href="#">6:66305363</a> | A/- | <a href="#">rs200857384</a> , <a href="#">rs</a> | 0/. |
| NM_001142800:c.-333+44308T>A  | <a href="#">6:66305363</a> | A/T | <a href="#">rs200857384</a> , <a href="#">rs</a> | 0/1 |
| NM_001142800:c.-333+44128dupT | <a href="#">6:66305543</a> | -/A | <a href="#">rs61686102</a>                       | 0/1 |
| NM_001142800:c.-333+43773T>C  | <a href="#">6:66305898</a> | A/G | <a href="#">rs9354267</a>                        | ALT |
| NM_001142800:c.-333+43435dupA | <a href="#">6:66306236</a> | -/T | <a href="#">rs11443686</a>                       | ALT |
| NM_001142800:c.-333+42528T>C  | <a href="#">6:66307143</a> | A/G | <a href="#">rs2183675</a>                        | ALT |
| NM_001142800:c.-333+41716A>G  | <a href="#">6:66307955</a> | T/C | <a href="#">rs189550</a>                         | REF |
| NM_001142800:c.-333+41544T>G  | <a href="#">6:66308127</a> | A/C |                                                  | 0/1 |

Table S6

|                               |                            |     |                             |     |
|-------------------------------|----------------------------|-----|-----------------------------|-----|
| NM_001142800:c.-333+41540T>G  | <a href="#">6:66308131</a> | A/C | <a href="#">rs112829973</a> | 0/1 |
| NM_001142800:c.-333+41529delT | <a href="#">6:66308142</a> | A/- | <a href="#">rs354341</a>    | 0/. |
| NM_001142800:c.-333+41529T>G  | <a href="#">6:66308142</a> | A/C | <a href="#">rs354341</a>    | 0/1 |
| NM_001142800:c.-333+41512G>T  | <a href="#">6:66308159</a> | C/A | <a href="#">rs35446336</a>  | REF |
| NM_001142800:c.-333+41346C>T  | <a href="#">6:66308325</a> | G/A | <a href="#">rs354342</a>    | REF |
| NM_001142800:c.-333+40579G>A  | <a href="#">6:66309092</a> | C/T | <a href="#">rs58886551</a>  | REF |
| NM_001142800:c.-333+40543A>T  | <a href="#">6:66309128</a> | T/A | <a href="#">rs57391513</a>  | REF |
| NM_001142800:c.-333+40356A>G  | <a href="#">6:66309315</a> | T/C | <a href="#">rs11963452</a>  | REF |
| NM_001142800:c.-333+40042G>A  | <a href="#">6:66309629</a> | C/T | <a href="#">rs77154807</a>  | REF |
| NM_001142800:c.-333+39983T>C  | <a href="#">6:66309688</a> | A/G | <a href="#">rs354343</a>    | ALT |
| NM_001142800:c.-333+39754G>A  | <a href="#">6:66309917</a> | C/T | <a href="#">rs17699558</a>  | ALT |
| NM_001142800:c.-333+39364G>T  | <a href="#">6:66310307</a> | C/A | <a href="#">rs12206843</a>  | ALT |
| NM_001142800:c.-333+39185G>A  | <a href="#">6:66310486</a> | C/T | <a href="#">rs16896896</a>  | REF |
| NM_001142800:c.-333+36525C>T  | <a href="#">6:66313146</a> | G/A | <a href="#">rs9453339</a>   | REF |
| NM_001142800:c.-333+35789G>A  | <a href="#">6:66313882</a> | C/T | <a href="#">rs168514</a>    | ALT |
| NM_001142800:c.-333+35748G>A  | <a href="#">6:66313923</a> | C/T | <a href="#">rs1929323</a>   | ALT |
| NM_001142800:c.-333+35645T>G  | <a href="#">6:66314026</a> | A/C | <a href="#">rs1387793</a>   | ALT |
| NM_001142800:c.-333+35521A>G  | <a href="#">6:66314150</a> | T/C | <a href="#">rs16896908</a>  | REF |
| NM_001142800:c.-333+35242A>C  | <a href="#">6:66314429</a> | T/G | <a href="#">rs6919704</a>   | ALT |
| NM_001142800:c.-333+34935A>G  | <a href="#">6:66314736</a> | T/C | <a href="#">rs11313675</a>  | REF |
| NM_001142800:c.-333+34791T>C  | <a href="#">6:66314880</a> | A/G | <a href="#">rs354401</a>    | ALT |
| NM_001142800:c.-333+34768dupA | <a href="#">6:66314903</a> | -/T | <a href="#">rs10626958</a>  | 0/. |
| NM_001142800:c.-333+34768delA | <a href="#">6:66314903</a> | T/- |                             | REF |
| NM_001142800:c.-333+34456delA | <a href="#">6:66315215</a> | T/- | <a href="#">rs34132189</a>  | REF |
| NM_001142800:c.-333+34188A>G  | <a href="#">6:66315483</a> | T/C | <a href="#">rs181129415</a> | REF |
| NM_001142800:c.-333+34080A>C  | <a href="#">6:66315591</a> | T/G | <a href="#">rs354400</a>    | REF |
| NM_001142800:c.-333+33938C>T  | <a href="#">6:66315733</a> | G/A |                             | REF |
| NM_001142800:c.-333+33750A>G  | <a href="#">6:66315921</a> | T/C | <a href="#">rs6930884</a>   | ALT |
| NM_001142800:c.-333+33523G>T  | <a href="#">6:66316148</a> | C/A | <a href="#">rs1907018</a>   | ALT |
| NM_001142800:c.-333+33444G>A  | <a href="#">6:66316227</a> | C/T | <a href="#">rs354398</a>    | ALT |
| NM_001142800:c.-333+33308T>G  | <a href="#">6:66316363</a> | A/C | <a href="#">rs1907017</a>   | ALT |
| NM_001142800:c.-333+33211T>A  | <a href="#">6:66316460</a> | A/T | <a href="#">rs1907016</a>   | ALT |
| NM_001142800:c.-333+33129G>T  | <a href="#">6:66316542</a> | C/A | <a href="#">rs1907015</a>   | ALT |
| NM_001142800:c.-333+32893dupA | <a href="#">6:66316778</a> | -/T | <a href="#">rs140167236</a> | 1/. |
| NM_001142800:c.-333+32893delA | <a href="#">6:66316778</a> | T/- | <a href="#">rs5876976</a>   | REF |
| NM_001142800:c.-333+32813C>T  | <a href="#">6:66316858</a> | G/A | <a href="#">rs354397</a>    | ALT |
| NM_001142800:c.-333+32780A>G  | <a href="#">6:66316891</a> | T/C | <a href="#">rs354396</a>    | ALT |
| NM_001142800:c.-333+32692A>G  | <a href="#">6:66316979</a> | T/C | <a href="#">rs354395</a>    | ALT |
| NM_001142800:c.-333+32334A>G  | <a href="#">6:66317337</a> | T/C | <a href="#">rs354394</a>    | ALT |
| NM_001142800:c.-333+32304G>A  | <a href="#">6:66317367</a> | C/T | <a href="#">rs7748738</a>   | ALT |
| NM_001142800:c.-333+31531T>A  | <a href="#">6:66318140</a> | A/T | <a href="#">rs354392</a>    | ALT |
| NM_001142800:c.-333+31086G>A  | <a href="#">6:66318585</a> | C/T | <a href="#">rs10447346</a>  | ALT |
| NM_001142800:c.-333+30946T>G  | <a href="#">6:66318725</a> | A/C | <a href="#">rs10447316</a>  | ALT |



Table S6

|                                          |                            |     |                             |     |
|------------------------------------------|----------------------------|-----|-----------------------------|-----|
| NM_001142800:c.-333+30441dupT            | <a href="#">6:66319230</a> | -/A | <a href="#">rs34304600</a>  | 0/1 |
| NM_001142800:c.-333+30400A>T             | <a href="#">6:66319271</a> | T/A | <a href="#">rs7744893</a>   | ALT |
| NM_001142800:c.-333+30191A>C             | <a href="#">6:66319480</a> | T/G | <a href="#">rs354391</a>    | ALT |
| NM_001142800:c.-333+29854A>T             | <a href="#">6:66319817</a> | T/A | <a href="#">rs7745746</a>   | ALT |
| NM_001142800:c.-333+29768G>A             | <a href="#">6:66319903</a> | C/T | <a href="#">rs1027188</a>   | ALT |
| NM_001142800:c.-333+29674A>C             | <a href="#">6:66319997</a> | T/G | <a href="#">rs35472556</a>  | REF |
| NM_001142800:c.-333+29501G>A             | <a href="#">6:66320170</a> | C/T | <a href="#">rs2351267</a>   | ALT |
| NM_001142800:c.-333+29332A>G             | <a href="#">6:66320339</a> | T/C | <a href="#">rs1490143</a>   | ALT |
| NM_001142800:c.-333+29152G>T             | <a href="#">6:66320519</a> | C/A | <a href="#">rs1490142</a>   | ALT |
| NM_001142800:c.-333+28901A>G             | <a href="#">6:66320770</a> | T/C | <a href="#">rs354387</a>    | ALT |
| NM_001142800:c.-333+28799C>T             | <a href="#">6:66320872</a> | G/A | <a href="#">rs191001672</a> | REF |
| NM_001142800:c.-333+28599dupT            | <a href="#">6:66321072</a> | -/A | <a href="#">rs200048825</a> | ALT |
| NM_001142800:c.-333+28545A>T             | <a href="#">6:66321126</a> | T/A | <a href="#">rs12198998</a>  | ALT |
| NM_001142800:c.-333+28521G>A             | <a href="#">6:66321150</a> | C/T | <a href="#">rs354386</a>    | ALT |
| NM_001142800:c.-333+27625T>C             | <a href="#">6:66322046</a> | A/G | <a href="#">rs12199458</a>  | ALT |
| NM_001142800:c.-333+27555T>C             | <a href="#">6:66322116</a> | A/G | <a href="#">rs183631341</a> | REF |
| NM_001142800:c.-333+27548A>G             | <a href="#">6:66322123</a> | T/C | <a href="#">rs12200913</a>  | ALT |
| NM_001142800:c.-333+27090G>A             | <a href="#">6:66322581</a> | C/T | <a href="#">rs7747445</a>   | ALT |
| NM_001142800:c.-333+27006dupT            | <a href="#">6:66322665</a> | -/A | <a href="#">rs11385339</a>  | ALT |
| NM_001142800:c.-333+26470G>A             | <a href="#">6:66323201</a> | C/T | <a href="#">rs13201651</a>  | REF |
| NM_001142800:c.-333+26464G>A             | <a href="#">6:66323207</a> | C/T | <a href="#">rs10806512</a>  | ALT |
| NM_001142800:c.-333+26261C>T             | <a href="#">6:66323410</a> | G/A | <a href="#">rs354382</a>    | ALT |
| NM_001142800:c.-333+25792C>T             | <a href="#">6:66323879</a> | G/A | <a href="#">rs2130498</a>   | ALT |
| NM_001142800:c.-333+25678A>C             | <a href="#">6:66323993</a> | T/G | <a href="#">rs1980987</a>   | ALT |
| NM_001142800:c.-333+25409T>G             | <a href="#">6:66324262</a> | A/C | <a href="#">rs7739112</a>   | ALT |
| NM_001142800:c.-333+25311C>G             | <a href="#">6:66324360</a> | G/C | <a href="#">rs168512</a>    | ALT |
| NM_001142800:c.-333+25297dupA            | <a href="#">6:66324374</a> | -/T | <a href="#">rs35160142</a>  | REF |
| NM_001142800:c.-333+25176C>T             | <a href="#">6:66324495</a> | G/A | <a href="#">rs354381</a>    | ALT |
| NM_001142800:c.-333+24894_-333+24895insT | <a href="#">6:66324777</a> | -/A | <a href="#">rs5876977</a>   | ALT |
| NM_001142800:c.-333+24879G>A             | <a href="#">6:66324792</a> | C/T | <a href="#">rs7758595</a>   | ALT |
| NM_001142800:c.-333+24652A>T             | <a href="#">6:66325019</a> | T/A | <a href="#">rs971620</a>    | REF |
| NM_001142800:c.-333+24033A>G             | <a href="#">6:66325638</a> | T/C | <a href="#">rs2046837</a>   | REF |
| NM_001142800:c.-333+24028G>A             | <a href="#">6:66325643</a> | C/T | <a href="#">rs2046836</a>   | REF |
| NM_001142800:c.-333+23938C>T             | <a href="#">6:66325733</a> | G/A | <a href="#">rs2046835</a>   | REF |
| NM_001142800:c.-333+23789A>T             | <a href="#">6:66325882</a> | T/A | <a href="#">rs12208402</a>  | ALT |
| NM_001142800:c.-333+23372delT            | <a href="#">6:66326299</a> | A/- | <a href="#">rs66800400</a>  | ALT |
| NM_001142800:c.-333+23067C>G             | <a href="#">6:66326604</a> | G/C | <a href="#">rs421733</a>    | REF |
| NM_001142800:c.-333+23063C>G             | <a href="#">6:66326608</a> | G/C | <a href="#">rs12213513</a>  | ALT |
| NM_001142800:c.-333+22994dupT            | <a href="#">6:66326677</a> | -/A | <a href="#">rs34322899</a>  | REF |
| NM_001142800:c.-333+22986delT            | <a href="#">6:66326685</a> | A/- |                             | REF |
| NM_001142800:c.-333+22726A>G             | <a href="#">6:66326945</a> | T/C | <a href="#">rs13207080</a>  | REF |
| NM_001142800:c.-333+22654C>G             | <a href="#">6:66327017</a> | G/C | <a href="#">rs973300</a>    | REF |
| NM_001142800:c.-333+22641G>C             | <a href="#">6:66327030</a> | C/G | <a href="#">rs973299</a>    | ALT |

Table S6

|                               |                            |     |                             |     |
|-------------------------------|----------------------------|-----|-----------------------------|-----|
| NM_001142800:c.-333+22620C>T  | <a href="#">6:66327051</a> | G/A | <a href="#">rs2351268</a>   | ALT |
| NM_001142800:c.-333+22501G>A  | <a href="#">6:66327170</a> | C/T | <a href="#">rs2351269</a>   | ALT |
| NM_001142800:c.-333+22039A>G  | <a href="#">6:66327632</a> | T/C | <a href="#">rs12210732</a>  | ALT |
| NM_001142800:c.-333+22025G>T  | <a href="#">6:66327646</a> | C/A | <a href="#">rs10944817</a>  | ALT |
| NM_001142800:c.-333+18242G>C  | <a href="#">6:66331429</a> | C/G | <a href="#">rs168511</a>    | REF |
| NM_001142800:c.-333+18158A>G  | <a href="#">6:66331513</a> | T/C | <a href="#">rs373700804</a> | REF |
| NM_001142800:c.-333+18062T>C  | <a href="#">6:66331609</a> | A/G | <a href="#">rs187126</a>    | ALT |
| NM_001142800:c.-333+17802A>C  | <a href="#">6:66331869</a> | T/G | <a href="#">rs4298329</a>   | ALT |
| NM_001142800:c.-333+17323G>A  | <a href="#">6:66332348</a> | C/T | <a href="#">rs354371</a>    | ALT |
| NM_001142800:c.-333+17022delA | <a href="#">6:66332649</a> | T/- | <a href="#">rs35201653</a>  | ./1 |
| NM_001142800:c.-333+16967T>C  | <a href="#">6:66332704</a> | A/G | <a href="#">rs354370</a>    | ALT |
| NM_001142800:c.-333+16771A>G  | <a href="#">6:66332900</a> | T/C | <a href="#">rs6926767</a>   | ALT |
| NM_001142800:c.-333+16566G>A  | <a href="#">6:66333105</a> | C/T | <a href="#">rs6900513</a>   | ALT |
| NM_001142800:c.-333+16152T>A  | <a href="#">6:66333519</a> | A/T | <a href="#">rs354369</a>    | ALT |
| NM_001142800:c.-333+16049G>C  | <a href="#">6:66333622</a> | C/G | <a href="#">rs728880</a>    | ALT |
| NM_001142800:c.-333+15999C>T  | <a href="#">6:66333672</a> | G/A | <a href="#">rs902287</a>    | ALT |
| NM_001142800:c.-333+15945G>C  | <a href="#">6:66333726</a> | C/G | <a href="#">rs728881</a>    | ALT |
| NM_001142800:c.-333+15397C>G  | <a href="#">6:66334274</a> | G/C | <a href="#">rs902286</a>    | ALT |
| NM_001142800:c.-333+15344C>T  | <a href="#">6:66334327</a> | G/A | <a href="#">rs4446546</a>   | ALT |
| NM_001142800:c.-333+14811A>T  | <a href="#">6:66334860</a> | T/A | <a href="#">rs12215492</a>  | ALT |
| NM_001142800:c.-333+14207C>T  | <a href="#">6:66335464</a> | G/A | <a href="#">rs1490139</a>   | ALT |
| NM_001142800:c.-333+14047T>A  | <a href="#">6:66335624</a> | A/T | <a href="#">rs354367</a>    | ALT |
| NM_001142800:c.-333+13705C>T  | <a href="#">6:66335966</a> | G/A | <a href="#">rs766199</a>    | ALT |
| NM_001142800:c.-333+13273C>T  | <a href="#">6:66336398</a> | G/A | <a href="#">rs6917909</a>   | ALT |
| NM_001142800:c.-333+13204G>T  | <a href="#">6:66336467</a> | C/A | <a href="#">rs6919315</a>   | ALT |
| NM_001142800:c.-333+13154A>T  | <a href="#">6:66336517</a> | T/A | <a href="#">rs968893</a>    | ALT |
| NM_001142800:c.-333+12908A>G  | <a href="#">6:66336763</a> | T/C | <a href="#">rs6903740</a>   | ALT |
| NM_001142800:c.-333+12872G>T  | <a href="#">6:66336799</a> | C/A | <a href="#">rs6919950</a>   | REF |
| NM_001142800:c.-333+12351T>C  | <a href="#">6:66337320</a> | A/G | <a href="#">rs9453347</a>   | ALT |
| NM_001142800:c.-333+12327G>A  | <a href="#">6:66337344</a> | C/T | <a href="#">rs139174916</a> | REF |
| NM_001142800:c.-333+12079C>T  | <a href="#">6:66337592</a> | G/A | <a href="#">rs12197389</a>  | ALT |
| NM_001142800:c.-333+12029C>T  | <a href="#">6:66337642</a> | G/A | <a href="#">rs111411564</a> | REF |
| NM_001142800:c.-333+11998G>A  | <a href="#">6:66337673</a> | C/T | <a href="#">rs12211326</a>  | ALT |
| NM_001142800:c.-333+11893G>A  | <a href="#">6:66337778</a> | C/T | <a href="#">rs12211385</a>  | ALT |
| NM_001142800:c.-333+11204C>T  | <a href="#">6:66338467</a> | G/A | <a href="#">rs6930269</a>   | ALT |
| NM_001142800:c.-333+11092T>C  | <a href="#">6:66338579</a> | A/G | <a href="#">rs62407730</a>  | REF |
| NM_001142800:c.-333+10904A>G  | <a href="#">6:66338767</a> | T/C | <a href="#">rs10455583</a>  | ALT |
| NM_001142800:c.-333+10823C>T  | <a href="#">6:66338848</a> | G/A | <a href="#">rs10455188</a>  | ALT |
| NM_001142800:c.-333+10537A>G  | <a href="#">6:66339134</a> | T/C | <a href="#">rs76385824</a>  | REF |
| NM_001142800:c.-333+10511C>G  | <a href="#">6:66339160</a> | G/C | <a href="#">rs10455189</a>  | ALT |
| NM_001142800:c.-333+10166T>C  | <a href="#">6:66339505</a> | A/G | <a href="#">rs12195089</a>  | ALT |
| NM_001142800:c.-333+9468G>A   | <a href="#">6:66340203</a> | C/T | <a href="#">rs1873292</a>   | ALT |
| NM_001142800:c.-333+9239G>A   | <a href="#">6:66340432</a> | C/T | <a href="#">rs2130493</a>   | ALT |
| NM_001142800:c.-333+9192A>G   | <a href="#">6:66340479</a> | T/C | <a href="#">rs10944827</a>  | ALT |
| NM_001142800:c.-333+9092G>A   | <a href="#">6:66340579</a> | C/T | <a href="#">rs10944828</a>  | ALT |
| NM_001142800:c.-333+8453A>G   | <a href="#">6:66341218</a> | T/C | <a href="#">rs1387800</a>   | ALT |
| NM_001142800:c.-333+8302dupT  | <a href="#">6:66341369</a> | -/A | <a href="#">rs5876981</a>   | 0/1 |
| NM_001142800:c.-333+7859C>A   | <a href="#">6:66341812</a> | G/T | <a href="#">rs6916915</a>   | ALT |
| NM_001142800:c.-333+7725G>A   | <a href="#">6:66341946</a> | C/T | <a href="#">rs16896967</a>  | REF |

Table S6

|                              |                            |     |                             |     |
|------------------------------|----------------------------|-----|-----------------------------|-----|
| NM_001142800:c.-333+7615A>C  | <a href="#">6:66342056</a> | T/G | <a href="#">rs13195796</a>  | REF |
| NM_001142800:c.-333+6998A>G  | <a href="#">6:66342673</a> | T/C | <a href="#">rs7745805</a>   | REF |
| NM_001142800:c.-333+5471G>C  | <a href="#">6:66344200</a> | C/G | <a href="#">rs10944829</a>  | ALT |
| NM_001142800:c.-333+4816G>A  | <a href="#">6:66344855</a> | C/T | <a href="#">rs1873291</a>   | REF |
| NM_001142800:c.-333+4680A>T  | <a href="#">6:66344991</a> | T/A | <a href="#">rs7760787</a>   | ALT |
| NM_001142800:c.-333+4573G>A  | <a href="#">6:66345098</a> | C/T | <a href="#">rs79739949</a>  | REF |
| NM_001142800:c.-333+4522G>A  | <a href="#">6:66345149</a> | C/T | <a href="#">rs1907010</a>   | ALT |
| NM_001142800:c.-333+4382C>T  | <a href="#">6:66345289</a> | G/A | <a href="#">rs4621617</a>   | ALT |
| NM_001142800:c.-333+3984C>T  | <a href="#">6:66345687</a> | G/A | <a href="#">rs7775327</a>   | ALT |
| NM_001142800:c.-333+3938G>T  | <a href="#">6:66345733</a> | C/A | <a href="#">rs6899544</a>   | ALT |
| NM_001142800:c.-333+3732G>A  | <a href="#">6:66345939</a> | C/T | <a href="#">rs6904116</a>   | ALT |
| NM_001142800:c.-333+3582C>A  | <a href="#">6:66346089</a> | G/T | <a href="#">rs1586656</a>   | ALT |
| NM_001142800:c.-333+3555A>G  | <a href="#">6:66346116</a> | T/C | <a href="#">rs138554316</a> | REF |
| NM_001142800:c.-333+3540C>G  | <a href="#">6:66346131</a> | G/C | <a href="#">rs1586657</a>   | ALT |
| NM_001142800:c.-333+3483T>A  | <a href="#">6:66346188</a> | A/T | <a href="#">rs10944830</a>  | ALT |
| NM_001142800:c.-333+3324T>G  | <a href="#">6:66346347</a> | A/C | <a href="#">rs1586658</a>   | ALT |
| NM_001142800:c.-333+3081A>G  | <a href="#">6:66346590</a> | T/C | <a href="#">rs1490126</a>   | ALT |
| NM_001142800:c.-333+2789A>T  | <a href="#">6:66346882</a> | T/A | <a href="#">rs4458657</a>   | ALT |
| NM_001142800:c.-333+2735A>C  | <a href="#">6:66346936</a> | T/G | <a href="#">rs2046838</a>   | ALT |
| NM_001142800:c.-333+2726A>G  | <a href="#">6:66346945</a> | T/C | <a href="#">rs2046839</a>   | ALT |
| NM_001142800:c.-333+2170T>G  | <a href="#">6:66347501</a> | A/C | <a href="#">rs6933242</a>   | ALT |
| NM_001142800:c.-333+1849G>A  | <a href="#">6:66347822</a> | C/T | <a href="#">rs6911669</a>   | ALT |
| NM_001142800:c.-333+1760C>T  | <a href="#">6:66347911</a> | G/A | <a href="#">rs12207870</a>  | ALT |
| NM_001142800:c.-333+1506C>T  | <a href="#">6:66348165</a> | G/A | <a href="#">rs6915285</a>   | ALT |
| NM_001142800:c.-333+1292G>A  | <a href="#">6:66348379</a> | C/T | <a href="#">rs12195141</a>  | ALT |
| NM_001142800:c.-333+1049G>A  | <a href="#">6:66348622</a> | C/T | <a href="#">rs6917401</a>   | ALT |
| NM_001142800:c.-447-123A>C   | <a href="#">6:66349908</a> | T/G | <a href="#">rs17779372</a>  | ALT |
| NM_001142800:c.-447-529delA  | <a href="#">6:66350314</a> | T/- | <a href="#">rs11312384</a>  | ALT |
| NM_001142800:c.-447-1257C>A  | <a href="#">6:66351042</a> | G/T | <a href="#">rs7739824</a>   | ALT |
| NM_001142800:c.-447-1551C>T  | <a href="#">6:66351336</a> | G/A | <a href="#">rs72648382</a>  | ALT |
| NM_001142800:c.-447-2595C>G  | <a href="#">6:66352380</a> | G/C | <a href="#">rs6907955</a>   | ALT |
| NM_001142800:c.-447-2617A>T  | <a href="#">6:66352402</a> | T/A | <a href="#">rs3919983</a>   | ALT |
| NM_001142800:c.-447-2642delA | <a href="#">6:66352427</a> | T/- | <a href="#">rs11299994</a>  | ALT |
| NM_001142800:c.-447-2753C>A  | <a href="#">6:66352538</a> | G/T | <a href="#">rs6908305</a>   | ALT |
| NM_001142800:c.-447-2816C>A  | <a href="#">6:66352601</a> | G/T | <a href="#">rs6908347</a>   | ALT |
| NM_001142800:c.-447-3877T>C  | <a href="#">6:66353662</a> | A/G | <a href="#">rs9363410</a>   | ALT |
| NM_001142800:c.-447-4228G>T  | <a href="#">6:66354013</a> | C/A | <a href="#">rs2351499</a>   | ALT |
| NM_001142800:c.-447-4603T>C  | <a href="#">6:66354388</a> | A/G | <a href="#">rs1826149</a>   | ALT |
| NM_001142800:c.-447-4641A>C  | <a href="#">6:66354426</a> | T/G | <a href="#">rs1826150</a>   | ALT |
| NM_001142800:c.-447-5024A>G  | <a href="#">6:66354809</a> | T/C | <a href="#">rs1994603</a>   | ALT |
| NM_001142800:c.-447-6123G>A  | <a href="#">6:66355908</a> | C/T | <a href="#">rs9363411</a>   | ALT |
| NM_001142800:c.-447-6804T>C  | <a href="#">6:66356589</a> | A/G | <a href="#">rs12207318</a>  | ALT |
| NM_001142800:c.-447-7019G>T  | <a href="#">6:66356804</a> | C/A | <a href="#">rs115460359</a> | REF |
| NM_001142800:c.-447-7026T>A  | <a href="#">6:66356811</a> | A/T | <a href="#">rs10806514</a>  | ALT |
| NM_001142800:c.-447-7704T>C  | <a href="#">6:66357489</a> | A/G | <a href="#">rs9342492</a>   | ALT |
| NM_001142800:c.-447-7944T>G  | <a href="#">6:66357729</a> | A/C | <a href="#">rs6919287</a>   | ALT |
| NM_001142800:c.-447-8424C>T  | <a href="#">6:66358209</a> | G/A | <a href="#">rs112653175</a> | REF |
| NM_001142800:c.-447-8426C>T  | <a href="#">6:66358211</a> | G/A |                             | REF |
| NM_001142800:c.-447-8467T>C  | <a href="#">6:66358252</a> | A/G | <a href="#">rs56361312</a>  | ALT |
| NM_001142800:c.-447-8508A>C  | <a href="#">6:66358293</a> | T/G | <a href="#">rs1826151</a>   | ALT |

Table S6

|                               |                            |     |                             |     |
|-------------------------------|----------------------------|-----|-----------------------------|-----|
| NM_001142800:c.-447-8816dupT  | <a href="#">6:66358601</a> | -/A | <a href="#">rs75589705</a>  | ALT |
| NM_001142800:c.-447-9018A>G   | <a href="#">6:66358803</a> | T/C | <a href="#">rs7765481</a>   | ALT |
| NM_001142800:c.-447-9038C>T   | <a href="#">6:66358823</a> | G/A | <a href="#">rs12190480</a>  | ALT |
| NM_001142800:c.-447-9071C>T   | <a href="#">6:66358856</a> | G/A | <a href="#">rs12191907</a>  | ALT |
| NM_001142800:c.-447-9246dupT  | <a href="#">6:66359031</a> | -/A | <a href="#">rs71677714</a>  | O/1 |
| NM_001142800:c.-447-9275C>T   | <a href="#">6:66359060</a> | G/A | <a href="#">rs374536933</a> | REF |
| NM_001142800:c.-447-9290A>T   | <a href="#">6:66359075</a> | T/A | <a href="#">rs372295707</a> | REF |
| NM_001142800:c.-447-10184T>A  | <a href="#">6:66359969</a> | A/T | <a href="#">rs1387795</a>   | ALT |
| NM_001142800:c.-447-10443A>G  | <a href="#">6:66360228</a> | T/C | <a href="#">rs1387796</a>   | ALT |
| NM_001142800:c.-447-12600A>G  | <a href="#">6:66362385</a> | T/C | <a href="#">rs9345665</a>   | ALT |
| NM_001142800:c.-447-12982A>G  | <a href="#">6:66362767</a> | T/C | <a href="#">rs958705</a>    | ALT |
| NM_001142800:c.-447-13032G>A  | <a href="#">6:66362817</a> | C/T | <a href="#">rs958706</a>    | ALT |
| NM_001142800:c.-447-13214A>T  | <a href="#">6:66362999</a> | T/A | <a href="#">rs11758603</a>  | REF |
| NM_001142800:c.-447-15087dupT | <a href="#">6:66364872</a> | -/A | <a href="#">rs36088825</a>  | REF |
| NM_001142800:c.-447-15820C>G  | <a href="#">6:66365605</a> | G/C | <a href="#">rs1844528</a>   | ALT |
| NM_001142800:c.-447-16373C>A  | <a href="#">6:66366158</a> | G/T | <a href="#">rs12195278</a>  | ALT |
| NM_001142800:c.-447-16546C>T  | <a href="#">6:66366331</a> | G/A | <a href="#">rs1602235</a>   | ALT |
| NM_001142800:c.-447-16662T>G  | <a href="#">6:66366447</a> | A/C | <a href="#">rs1602234</a>   | ALT |
| NM_001142800:c.-447-17970A>C  | <a href="#">6:66367755</a> | T/G | <a href="#">rs2200941</a>   | ALT |
| NM_001142800:c.-447-19519A>G  | <a href="#">6:66369304</a> | T/C | <a href="#">rs9345666</a>   | ALT |
| NM_001142800:c.-447-20781G>A  | <a href="#">6:66370566</a> | C/T | <a href="#">rs1387807</a>   | ALT |
| NM_001142800:c.-447-20994A>G  | <a href="#">6:66370779</a> | T/C | <a href="#">rs2171902</a>   | ALT |
| NM_001142800:c.-447-24071T>G  | <a href="#">6:66373856</a> | A/C | <a href="#">rs9345667</a>   | ALT |
| NM_001142800:c.-447-24072G>A  | <a href="#">6:66373857</a> | C/T | <a href="#">rs9363416</a>   | ALT |
| NM_001142800:c.-447-25019G>A  | <a href="#">6:66374804</a> | C/T | <a href="#">rs923537</a>    | ALT |
| NM_001142800:c.-447-25759A>C  | <a href="#">6:66375544</a> | T/G | <a href="#">rs7761627</a>   | ALT |
| NM_001142800:c.-447-25886T>A  | <a href="#">6:66375671</a> | A/T | <a href="#">rs7757773</a>   | ALT |
| NM_001142800:c.-447-26179dupA | <a href="#">6:66375964</a> | -/T |                             | REF |
| NM_001142800:c.-447-26179delA | <a href="#">6:66375964</a> | T/- |                             | REF |
| NM_001142800:c.-447-26209C>T  | <a href="#">6:66375994</a> | G/A | <a href="#">rs7741090</a>   | ALT |
| NM_001142800:c.-447-26281C>T  | <a href="#">6:66376066</a> | G/A | <a href="#">rs9354272</a>   | ALT |
| NM_001142800:c.-447-27066delT | <a href="#">6:66376851</a> | A/- |                             | REF |
| NM_001142800:c.-447-28089A>T  | <a href="#">6:66377874</a> | T/A | <a href="#">rs923534</a>    | ALT |
| NM_001142800:c.-447-28154A>G  | <a href="#">6:66377939</a> | T/C | <a href="#">rs923535</a>    | ALT |
| NM_001142800:c.-447-29854G>T  | <a href="#">6:66379639</a> | C/A | <a href="#">rs10455190</a>  | ALT |
| NM_001142800:c.-447-30126A>G  | <a href="#">6:66379911</a> | T/C | <a href="#">rs9283820</a>   | ALT |
| NM_001142800:c.-447-31642T>A  | <a href="#">6:66381427</a> | A/T | <a href="#">rs993015</a>    | ALT |
| NM_001142800:c.-447-32008A>G  | <a href="#">6:66381793</a> | T/C | <a href="#">rs1490120</a>   | ALT |
| NM_001142800:c.-447-32381T>C  | <a href="#">6:66382166</a> | A/G | <a href="#">rs7739376</a>   | ALT |
| NM_001142800:c.-447-33215C>T  | <a href="#">6:66383000</a> | G/A | <a href="#">rs12197906</a>  | ALT |
| NM_001142800:c.-447-33552T>C  | <a href="#">6:66383337</a> | A/G | <a href="#">rs6907252</a>   | ALT |
| NM_001142800:c.-448+33470G>A  | <a href="#">6:66383558</a> | C/T | <a href="#">rs6928284</a>   | ALT |
| NM_001142800:c.-448+32697T>C  | <a href="#">6:66384331</a> | A/G | <a href="#">rs10455585</a>  | ALT |
| NM_001142800:c.-448+30776T>G  | <a href="#">6:66386252</a> | A/C | <a href="#">rs7761171</a>   | ALT |
| NM_001142800:c.-448+30007C>T  | <a href="#">6:66387021</a> | G/A | <a href="#">rs200465206</a> | REF |
| NM_001142800:c.-448+29090C>A  | <a href="#">6:66387938</a> | G/T | <a href="#">rs1907009</a>   | ALT |
| NM_001142800:c.-448+28329A>C  | <a href="#">6:66388699</a> | T/G | <a href="#">rs1490121</a>   | ALT |

Table S6

|                               |                            |     |                             |     |
|-------------------------------|----------------------------|-----|-----------------------------|-----|
| NM_001142800:c.-448+28318dupT | <a href="#">6:66388710</a> | -/A | <a href="#">rs34345454</a>  | 0/1 |
| NM_001142800:c.-448+28275C>T  | <a href="#">6:66388753</a> | G/A | <a href="#">rs1490122</a>   | ALT |
| NM_001142800:c.-448+26177G>A  | <a href="#">6:66390851</a> | C/T | <a href="#">rs2130491</a>   | ALT |
| NM_001142800:c.-448+25747C>T  | <a href="#">6:66391281</a> | G/A | <a href="#">rs2087538</a>   | ALT |
| NM_001142800:c.-448+24395C>G  | <a href="#">6:66392633</a> | G/C | <a href="#">rs1158424</a>   | ALT |
| NM_001142800:c.-448+23745A>T  | <a href="#">6:66393283</a> | T/A | <a href="#">rs117516822</a> | REF |
| NM_001142800:c.-448+22870A>C  | <a href="#">6:66394158</a> | T/G | <a href="#">rs10944833</a>  | ALT |
| NM_001142800:c.-448+22430G>T  | <a href="#">6:66394598</a> | C/A | <a href="#">rs1490124</a>   | ALT |
| NM_001142800:c.-448+22266C>T  | <a href="#">6:66394762</a> | G/A | <a href="#">rs2130492</a>   | ALT |
| NM_001142800:c.-448+21737T>A  | <a href="#">6:66395291</a> | A/T | <a href="#">rs6904807</a>   | ALT |
| NM_001142800:c.-448+21499C>T  | <a href="#">6:66395529</a> | G/A | <a href="#">rs6924750</a>   | ALT |
| NM_001142800:c.-448+21324C>T  | <a href="#">6:66395704</a> | G/A | <a href="#">rs6924950</a>   | ALT |
| NM_001142800:c.-448+20795A>T  | <a href="#">6:66396233</a> | T/A | <a href="#">rs12208064</a>  | ALT |
| NM_001142800:c.-448+20646G>A  | <a href="#">6:66396382</a> | C/T | <a href="#">rs9354275</a>   | ALT |
| NM_001142800:c.-448+20345G>A  | <a href="#">6:66396683</a> | C/T | <a href="#">rs2351500</a>   | ALT |
| NM_001142800:c.-448+20048C>A  | <a href="#">6:66396980</a> | G/T | <a href="#">rs2351501</a>   | ALT |
| NM_001142800:c.-448+19541T>C  | <a href="#">6:66397487</a> | A/G | <a href="#">rs6455052</a>   | ALT |
| NM_001142800:c.-448+19517T>G  | <a href="#">6:66397511</a> | A/C | <a href="#">rs7754201</a>   | ALT |
| NM_001142800:c.-448+19337C>T  | <a href="#">6:66397691</a> | G/A |                             | REF |
| NM_001142800:c.-448+19336G>C  | <a href="#">6:66397692</a> | C/G |                             | REF |
| NM_001142800:c.-448+17964A>T  | <a href="#">6:66399064</a> | T/A |                             | ALT |
| NM_001142800:c.-448+17183T>C  | <a href="#">6:66399845</a> | A/G | <a href="#">rs6902244</a>   | ALT |
| NM_001142800:c.-448+17131G>C  | <a href="#">6:66399897</a> | C/G | <a href="#">rs6923019</a>   | ALT |
| NM_001142800:c.-448+16406A>G  | <a href="#">6:66400622</a> | T/C | <a href="#">rs72648383</a>  | ALT |
| NM_001142800:c.-448+16232T>C  | <a href="#">6:66400796</a> | A/G | <a href="#">rs112562414</a> | ALT |
| NM_001142800:c.-448+15354A>C  | <a href="#">6:66401674</a> | T/G | <a href="#">rs9445566</a>   | REF |
| NM_001142800:c.-448+14500T>C  | <a href="#">6:66402528</a> | A/G | <a href="#">rs35543758</a>  | ALT |
| NM_001142800:c.-448+13730delA | <a href="#">6:66403298</a> | T/- | <a href="#">rs58238248</a>  | 0/1 |
| NM_001142800:c.-448+13191T>C  | <a href="#">6:66403837</a> | A/G | <a href="#">rs12211518</a>  | ALT |
| NM_001142800:c.-448+12992G>A  | <a href="#">6:66404036</a> | C/T | <a href="#">rs12204750</a>  | ALT |
| NM_001142800:c.-448+12846T>C  | <a href="#">6:66404182</a> | A/G | <a href="#">rs12529251</a>  | ALT |
| NM_001142800:c.-448+12733C>A  | <a href="#">6:66404295</a> | G/T | <a href="#">rs375062337</a> | REF |
| NM_001142800:c.-448+12392dupT | <a href="#">6:66404636</a> | -/A | <a href="#">rs34494006</a>  | 0/1 |
| NM_001142800:c.-448+12041C>T  | <a href="#">6:66404987</a> | G/A | <a href="#">rs12192822</a>  | ALT |
| NM_001142800:c.-448+11499delA | <a href="#">6:66405529</a> | T/- | <a href="#">rs71815460</a>  | ALT |
| NM_001142800:c.-448+10943T>C  | <a href="#">6:66406085</a> | A/G | <a href="#">rs72648385</a>  | ALT |
| NM_001142800:c.-448+10270C>T  | <a href="#">6:66406758</a> | G/A | <a href="#">rs6916913</a>   | ALT |
| NM_001142800:c.-448+9020A>G   | <a href="#">6:66408008</a> | T/C | <a href="#">rs2812772</a>   | ALT |
| NM_001142800:c.-448+8980T>C   | <a href="#">6:66408048</a> | A/G | <a href="#">rs2812773</a>   | ALT |
| NM_001142800:c.-448+8824A>G   | <a href="#">6:66408204</a> | T/C | <a href="#">rs2636123</a>   | ALT |
| NM_001142800:c.-448+8553T>G   | <a href="#">6:66408475</a> | A/C | <a href="#">rs2812774</a>   | ALT |
| NM_001142800:c.-448+8270T>C   | <a href="#">6:66408758</a> | A/G | <a href="#">rs1873294</a>   | ALT |
| NM_001142800:c.-448+8058G>A   | <a href="#">6:66408970</a> | C/T | <a href="#">rs1873293</a>   | ALT |
| NM_001142800:c.-448+7273G>A   | <a href="#">6:66409755</a> | C/T | <a href="#">rs2812775</a>   | ALT |
| NM_001142800:c.-448+7244T>C   | <a href="#">6:66409784</a> | A/G | <a href="#">rs2812776</a>   | ALT |
| NM_001142800:c.-448+7239A>G   | <a href="#">6:66409789</a> | T/C | <a href="#">rs2814115</a>   | ALT |

Table S6

|                             |                            |     |                           |     |
|-----------------------------|----------------------------|-----|---------------------------|-----|
| NM_001142800:c.-448+6942C>G | <a href="#">6:66410086</a> | G/C | <a href="#">rs2812777</a> | ALT |
| NM_001142800:c.-448+6328G>T | <a href="#">6:66410700</a> | C/A | <a href="#">rs2812778</a> | ALT |
| NM_001142800:c.-448+5697A>G | <a href="#">6:66411331</a> | T/C | <a href="#">rs1490130</a> | ALT |
| NM_001142800:c.-448+4330C>T | <a href="#">6:66412698</a> | G/A | <a href="#">rs1387801</a> | ALT |
| NM_001142800:c.-448+3949A>G | <a href="#">6:66413079</a> | T/C | <a href="#">rs2814114</a> | ALT |
| NM_001142800:c.-448+1760T>G | <a href="#">6:66415268</a> | A/C | <a href="#">rs1021350</a> | ALT |
| NM_001142800:c.-448+1338C>A | <a href="#">6:66415690</a> | G/T | <a href="#">rs997075</a>  | ALT |

**RP1**

| <b>HGVS c. (Clinically Relevant)</b> | <b>HGVS p. (Clinically Relevant)</b> | <b>Chr:Pos</b>             | <b>Ref/Alt</b> | <b>Identifier</b>          | <b>Haplotype</b> |
|--------------------------------------|--------------------------------------|----------------------------|----------------|----------------------------|------------------|
| NM_006269:c.-13+191A>G               |                                      | <a href="#">8:55528953</a> | A/G            | <a href="#">rs702761</a>   | ALT              |
| NM_006269:c.-13+311C>T               |                                      | <a href="#">8:55529073</a> | C/T            | <a href="#">rs9643828</a>  | ALT              |
| NM_006269:c.-13+725T>A               |                                      | <a href="#">8:55529487</a> | T/A            | <a href="#">rs6473949</a>  | ALT              |
| NM_006269:c.-13+850A>G               |                                      | <a href="#">8:55529612</a> | A/G            | <a href="#">rs145290</a>   | ALT              |
| NM_006269:c.-12-1998G>A              |                                      | <a href="#">8:55531517</a> | G/A            | <a href="#">rs436527</a>   | ALT              |
| NM_006269:c.788-202G>A               |                                      | <a href="#">8:55537028</a> | G/A            |                            | REF              |
| NM_006269:c.788-193C>A               |                                      | <a href="#">8:55537037</a> | C/A            |                            | REF              |
| NM_006269:c.788-92T>C                |                                      | <a href="#">8:55537138</a> | T/C            | <a href="#">rs429668</a>   | ALT              |
| NM_006269:c.2615G>A                  | p.Arg872His                          | <a href="#">8:55539057</a> | G/A            | <a href="#">rs444772</a>   | ALT              |
| NM_006269:c.2690_2695delCTTTG<br>A   | p.Ser897Ter                          | <a href="#">8:55539132</a> | CTTTGA/-       |                            | ALT              |
| NM_006269:c.2953A>T                  | p.Asn985Tyr                          | <a href="#">8:55539395</a> | A/T            | <a href="#">rs2293869</a>  | REF              |
| NM_006269:c.5008G>A                  | p.Ala1670Thr                         | <a href="#">8:55541450</a> | G/A            | <a href="#">rs446227</a>   | ALT              |
| NM_006269:c.5071T>C                  | p.Ser1691Pro                         | <a href="#">8:55541513</a> | T/C            | <a href="#">rs414352</a>   | ALT              |
| NM_006269:c.5175A>G                  | p.Gln1725=                           | <a href="#">8:55541617</a> | A/G            | <a href="#">rs441800</a>   | ALT              |
| NM_006269:c.6098G>A                  | p.Cys2033Tyr                         | <a href="#">8:55542540</a> | G/A            | <a href="#">rs61739567</a> | REF              |
| NM_006269:c.*247_*248insTT           |                                      | <a href="#">8:55543161</a> | -/TT           | <a href="#">rs10654889</a> | REF              |
